# Supplementary material
Source: Royal Society of Chemistry journal article supplement (https://www.rsc.org/suppdata/p2/1999/2041/904809j.doc)
Supplement: Supplementary file 1 [file 904809j.doc]

**Supplementary Material**

**An *Ab Initio* Study of -Fragmentation Reactions in Some Alkoxyacyl (Alkoxycarbonyl) and Related Radicals.**

Tauna Morihovitis, Carl H. Schiesser*and Melissa A. Skidmore

School of Chemistry, The University of Melbourne, Parkville, Victoria, Australia, 3052

_______________________________________________________________________________

HF/6-311G**, MP2/6-311G**, MP2/cc-pVDZ and MP2/aug-cc-pVDZ Gaussian Archive entries for the optimized structures in this study and higher-level calculated single-point energies (39 pages).

_______________________________________________________________________________________________

# Methoxyacyl radical (2, R = Me)

UHF/6-311G**

1\1\ CSIRO-CHERAX\FOpt\UHF\6-311G(d,p)\C2H3O2(2)\MEMAS\27-Jan-1999\1\\

#UHF/6-311G** OPT=GRAD SCF=DIRECT\\this is a calc with the oxygen up t

he other way\\0,2\O\C,1,R2\O,2,R3,1,A3\C,3,R4,2,A4,1,0.,0\H,4,R5,3,A5,

2,180.,0\H,4,R6,3,A6,2,D6,0\H,4,R6,3,A6,2,-D6,0\\R2=1.16312754\R3=1.29

683149\R4=1.43215708\R5=1.07776058\R6=1.08101832\A3=131.16321423\A4=11

6.8681033\A5=105.70763252\A6=109.84800832\D6=60.5522945\\Version=CrayX

MP-Unicos-G94RevB.3\State=2-A'\HF=-227.2167694\S2=0.761\S2-1=0.\S2A=0.

75\RMSD=8.009e-09\RMSF=1.943e-04\Dipole=0.9690701,0.,0.43443\PG=CS [SG

(C2H1O2),X(H2)]\\@

MP2/6-311G**

1\1\ CSIRO-CHERAX\FOpt\UMP2-FC\6-311G(d,p)\C2H3O2(2)\MEMAS\27-Jan-1999

\1\\#MP2=DIRECT/6-311G** GEOM=CHECKPOINT OPT=GRAD SCF=DIRECT\\this is

a calc with the oxygen up the other way\\0,2\O\C,1,R2\O,2,R3,1,A3\C,3,

R4,2,A4,1,0.,0\H,4,R5,3,A5,2,180.,0\H,4,R6,3,A6,2,D6,0\H,4,R6,3,A6,2,-

D6,0\\R2=1.19201063\R3=1.32260288\R4=1.45013835\R5=1.08687577\R6=1.090

83465\A3=130.43356167\A4=113.75553033\A5=105.45218899\A6=109.81280357\

D6=60.40978245\\Version=CrayXMP-Unicos-G94RevB.3\State=2-A'\HF=-227.21

37437\MP2=-227.8680923\PUHF=-227.2168053\PMP2-0=-227.8701191\S2=0.763\

S2-1=0.754\S2A=0.75\RMSD=6.214e-09\RMSF=1.565e-04\Dipole=0.9746974,0.,

0.2048192\PG=CS [SG(C2H1O2),X(H2)]\\@

QCISD/6-311G**//MP2/6-311G**

QCISD=-227.8915595

CCSD(T)/6-311G**//MP2/6-311G**

CCSD(T)=-227.9138362

B3LYP/6-311G**

1\1\ CSIRO-CHERAX\FOpt\UB3LYP\6-311G(d,p)\C2H3O2(2)\MELMW\02-Feb-1999\

1\\#B3LYP/6-311G** GEOM=CHECKPOINT OPT=(GRAD) SCF=DIRECT\\this is a ca

lc of MeOCO-ccpvdz\\0,2\O\C,1,R2\O,2,R3,1,A3\C,3,R4,2,A4,1,0.,0\H,4,R5

,3,A5,2,180.,0\H,4,R6,3,A6,2,D6,0\H,4,R6,3,A6,2,-D6,0\\R2=1.18769312\R

3=1.31500832\R4=1.46560429\R5=1.08619636\R6=1.08994158\A3=130.66661498

\A4=116.0013664\A5=105.29751689\A6=109.5518106\D6=60.47209849\\Version

=CrayXMP-Unicos-G94RevB.3\State=2-A'\HF=-228.4646748\S2=0.753\S2-1=0.\

S2A=0.75\RMSD=7.932e-09\RMSF=5.375e-05\Dipole=1.0178499,0.,0.2826708\P

G=CS [SG(C2H1O2),X(H2)]\\

MP2/cc-pVDZ

1\1\ CSIRO-CHERAX\FOpt\UMP2-FC\CC-pVDZ\C2H3O2(2)\MELMW\28-Jan-1999\1\\

#MP2=DIRECT/CC-PVDZ GEOM=CHECKPOINT OPT=(GRAD) SCF=DIRECT\\this is a c

alc of MeOCO-ccpvdz\\0,2\O\C,1,R2\O,2,R3,1,A3\C,3,R4,2,A4,1,0.,0\H,4,R

5,3,A5,2,180.,0\H,4,R6,3,A6,2,D6,0\H,4,R6,3,A6,2,-D6,0\\R2=1.19903886\

R3=1.33102955\R4=1.45336615\R5=1.09626181\R6=1.10020637\A3=130.1601710

3\A4=113.56745239\A5=105.55902817\A6=109.98147579\D6=60.41177094\\Vers

ion=CrayXMP-Unicos-G94RevB.3\State=2-A'\HF=-227.1706249\MP2=-227.78649

42\PUHF=-227.1737303\PMP2-0=-227.7885384\S2=0.763\S2-1=0.754\S2A=0.75\

RMSD=6.416e-09\RMSF=7.521e-05\Dipole=0.9491884,0.,0.1938278\PG=CS [SG(

C2H1O2),X(H2)]\\@

QCISD/ cc-pVDZ//MP2/ cc-pVDZ

QCISD=-227.8144507

CCSD(T)/ cc-pVDZ//MP2/ cc-pVDZ

CCSD(T)=-227.8321532

MP2/aug-cc-pVDZ

1\1\ CSIRO-CHERAX\FOpt\UMP2-FC\CC-pVDZ\C2H3O2(2)\MELMW\28-Jan-1999\1\\

#MP2=DIRECT/AUG-CC-PVDZ GEOM=CHECKPOINT OPT=(GRAD) SCF=DIRECT\\this is

a calc of MeOCO-ccpvdz\\0,2\O\C,1,R2\O,2,R3,1,A3\C,3,R4,2,A4,1,0.,0\H

,4,R5,3,A5,2,180.,0\H,4,R6,3,A6,2,D6,0\H,4,R6,3,A6,2,-D6,0\\R2=1.20359

906\R3=1.3333966\R4=1.46796948\R5=1.09460538\R6=1.09809254\A3=130.5808

9304\A4=113.77873972\A5=105.03001705\A6=109.36512416\D6=60.46049227\\V

ersion=CrayXMP-Unicos-G94RevB.3\State=2-A'\HF=-227.1849361\MP2=-227.83

49712\PUHF=-227.1880576\PMP2-0=-227.8370593\S2=0.764\S2-1=0.755\S2A=0.

75\RMSD=3.585e-09\RMSF=4.608e-05\Dipole=1.0031098,0.,0.2565462\PG=CS [

SG(C2H1O2),X(H2)]\\@

QCISD/ aug-cc-pVDZ//MP2/ aug-cc-pVDZ

QCISD=-227.8613155

CCSD(T)/ aug-cc-pVDZ//MP2/ aug-cc-pVDZ

CCSD(T)=-227.8833374

MP2/cc-pVTZ//MP2/aug-cc-pVDZ

MP2=-228.0096373

MP2/aug-cc-pVTZ//MP2/aug-cc-pVDZ

MP2=-228.0276357

# _______________________________________________________

# Ethoxyacyl radical (2, R = Et)

UHF/6-311G**

1\1\GINC-CNET10\FOpt\UHF\6-311G(d,p)\C3H5O2(2)\BLONDIE\07-Mar-1999\0\\

#UHF/6-311G** OPT SCF=DIRECT\\this is another convergance thing\\0,2\O

,-1.5905617995,0.,-1.3585082341\C,-1.479075367,0.,-0.1999288901\O,-0.4

277230507,0.,0.5569261604\C,0.8577807854,0.,-0.0956891418\C,1.91504109

46,0.,0.9821971691\H,0.9176575853,0.8786567746,-0.7244681356\H,0.91765

75853,-0.8786567746,-0.7244681356\H,2.8999423858,0.,0.5256476106\H,1.8

242710838,-0.8803952132,1.6082352135\H,1.8242710838,0.8803952132,1.608

2352135\\Version=DEC-AXP-OSF/1-G94RevE.2\HF=-266.2666744\S2=0.761\S2-1

=0.\S2A=0.75\RMSD=6.874e-09\RMSF=2.328e-05\Dipole=1.0817656,0.,0.41428

09\PG=CS [SG(C3H1O2),X(H4)]\\@

MP2/6-311G**

1\1\GINC-CHERAX\FOpt\UMP2-FC\6-311G(d,p)\C3H5O2(2)\MELMW\08-Mar-1999\0

\\#MP2=DIRECT/6-311G** GEOM=CHECKPOINT OPT SCF=DIRECT\\this is another

convergance thing\\0,2\O,-1.548737951,0.,-1.3980618593\C,-1.491235734

4,0.,-0.2069357193\O,-0.4440459316,0.,0.601554537\C,0.8434578237,0.,-0

.0872103495\C,1.9152028435,0.,0.9774663998\H,0.8894892882,0.8876154681

,-0.7232391205\H,0.8894892882,-0.8876154681,-0.7232391205\H,2.90143094

62,0.,0.5049794506\H,1.8286559708,-0.8879191099,1.6068176918\H,1.82865

59708,0.8879191099,1.6068176918\\Version=CrayXMP-Unicos-G94RevB.3\Stat

e=2-A'\HF=-266.2635\MP2=-267.0683857\PUHF=-266.266577\PMP2-0=-267.0704

136\S2=0.763\S2-1=0.754\S2A=0.75\RMSD=8.446e-09\RMSF=5.481e-05\Dipole=

1.0526305,0.,0.2301472\PG=CS [SG(C3H1O2),X(H4)]\\@

QCISD/6-311G**//MP2/6-311G**

QCISD=-267.104089

CCSD(T)/6-311G**//MP2/6-311G**

CCSD(T)=-267.1319407

B3LYP/6-311G**

1\1\GINC-CNET12\FOpt\UB3LYP\6-311G(d,p)\C3H5O2(2)\BLONDIE\07-Mar-1999\

0\\#B3LYP/6-311G** OPT GEOM=CHECKPOINT SCF=DIRECT\\this is another con

vergance thing\\0,2\O,1.2608241836,-1.3866939152,0.964379982\C,1.19181

95488,-0.2011073638,0.9115996742\O,0.3529310031,0.5809203503,0.2699500

841\C,-0.6932009594,-0.0935747596,-0.5302159789\C,-1.5326979303,0.9850

867122,-1.1723309417\H,-1.2677145103,-0.7279801734,0.1471688563\H,-0.1

898464137,-0.7279801734,-1.2620289581\H,-2.3213926398,0.5270976174,-1.

7755882393\H,-0.9247707364,1.6163118581,-1.8233318172\H,-2.0018411473,

1.6163118581,-0.415176892\\Version=DEC-AXP-OSF/1-G94RevE.2\HF=-267.795

3391\S2=0.753\S2-1=0.\S2A=0.75\RMSD=5.056e-09\RMSF=1.116e-04\Dipole=1.

1380841,0.,0.2903203\PG=CS [SG(C3H1O2),X(H4)]\\@

**_______________________________________________________**

# *iso*-Propoxyacyl radical (2, R = *iso*-Pr)

UHF/6-311G**

1\1\GINC-GIUNDA\FOpt\UHF\6-311G(d,p)\C4H7O2(2)\BLONDIE\30-Mar-1998\0\\

#UHF/6-311G** GEOM=CHECKPOINT SCF=DIRECT OPT\\the calculation of the g

round state radical MeOCO\\0,2\C,-1.5747867193,0.0005691556,0.00597338

88\O,-1.5135635761,0.0006105268,1.1701072711\O,-0.6737085503,0.0001936

555,-0.9201875729\C,0.7502213506,-0.0003032433,-0.6033688974\H,1.18544

81803,-0.000512183,-1.5921409962\C,1.1440370995,-1.2774040249,0.119012

1231\C,1.1449578553,1.2765891871,0.1188778309\H,2.2261870116,-1.321344

428,0.1955455645\H,0.8079552807,-2.1456068891,-0.437592821\H,0.7272093

492,-1.3164918762,1.1172070407\H,2.2271391578,1.3197572411,0.195406915

4\H,0.8095022914,2.1449756304,-0.4378185083\H,0.7281582236,1.316082599

,1.1170685464\\Version=DEC-AXP-OSF/1-G94RevE.2\HF=-305.3119764\S2=0.76

1\S2-1=0.\S2A=0.75\RMSD=6.793e-09\RMSF=3.154e-05\Dipole=1.0836271,-0.0

00418,-0.4874317\PG=C01 [X(C4H7O2)]\\@

MP2/6-311G**

1\1\ CSIRO-CHERAX\FOpt\UMP2-FC\6-311G(d,p)\C4H7O2(2)\MEMAS\21-Oct-1998

\0\\#MP2=DIRECT/6-311G** SCF=DIRECT GUESS=CHECK GEOM=CHECKPOINT OPT\\t

he calculation of the ground state radical MeOCO\\0,2\C,-0.9831626025,

-1.2233823378,0.\O,0.0132345283,-1.8820041284,0.\O,-1.1822083299,0.081

1620741,0.\C,0.,0.965391951,0.\H,-0.475915421,1.9482375637,0.\C,0.8059

582119,0.7889806082,1.2755546299\C,0.8059582119,0.7889806082,-1.275554

6299\H,1.5698438646,1.5707311674,1.3249126172\H,1.3004942974,-0.183452

2056,1.2976300189\H,0.1572532914,0.8820579845,2.149915579\H,1.56984386

46,1.5707311674,-1.3249126172\H,0.1572532914,0.8820579845,-2.149915579

\H,1.3004942974,-0.1834522056,-1.2976300189\\Version=CrayXMP-Unicos-G9

4RevB.3\State=2-A'\HF=-305.3085157\MP2=-306.2676063\PUHF=-305.311583\P

MP2-0=-306.2695969\S2=0.762\S2-1=0.754\S2A=0.75\RMSD=8.582e-10\RMSF=5.

202e-05\Dipole=0.4417055,1.0216755,0.\PG=CS [SG(C2H1O2),X(C2H6)]\

QCISD/6-311G**//MP2/6-311G**

QCISD=-306.314756

CCSD(T)/6-311G**//MP2/6-311G**

CCSD(T)=-306.3488233

B3LYP/6-311G**

1\1\GINC-MURLIBOBO\FOpt\UB3LYP\6-311G(d,p)\C4H7O2(2)\BLONDIE\24-Nov-19

98\0\\#B3LYP/6-311G** GEOM=CHECKPOINT SCF=DIRECT OPT=GRAD\\the calcula

tion of the ground state radical MeOCO\\0,2\C,-1.5894174057,0.00061400

21,0.0171970856\O,-1.4893586915,0.0008224627,1.2039221922\O,-0.6989271

048,0.0000962778,-0.9431537165\C,0.7673923098,-0.0003533383,-0.6106698

923\H,1.1939332167,-0.0005307461,-1.6142652558\C,1.1443529741,-1.28289

06155,0.1127672279\C,1.1452208332,1.2819791452,0.1126779123\H,2.232181

8133,-1.3331243838,0.215635343\H,0.8168667361,-2.1552040438,-0.4565871

189\H,0.7028556674,-1.3238061747,1.1092711092\H,2.2330898519,1.3315288

705,0.2154391369\H,0.8182305937,2.154470596,-0.4566903575\H,0.70383622

31,1.3232207965,1.1092153361\\Version=DEC-AXP-OSF/1-G94RevD.3\HF=-307.

122583\S2=0.753\S2-1=0.\S2A=0.75\RMSD=5.644e-09\RMSF=5.813e-05\Dipole=

1.1554639,-0.0004977,-0.3710853\PG=C01 [X(C4H7O2)]\\@

**______________________________________________________**

# *tert*-Butoxyacyl radical (2, R = *tert*-Bu)

UHF/6-311G**

1\1\GINC-GIUNDA\FOpt\UHF\6-311G(d,p)\C5H9O2(2)\BLONDIE\03-Mar-1998\0\\

#UHF/6-311G** GEOM=CHECKPOINT SCF=DIRECT OPT\\the calculation of the g

round state radical MeOCO\\0,2\C,1.4098366739,0.3835579311,-1.07251993

67\O,1.3371233263,1.5460904455,-1.0166597969\O,0.718913638,-0.57157891

39,-0.5472377042\C,-0.4373857729,-0.333745741,0.3326279262\C,-0.891329

5554,-1.7441964966,0.6776669388\C,-1.5123003846,0.4204830112,-0.441372

8992\C,0.0221639628,0.4199601021,1.5752514106\H,-1.7543709271,-1.70587

53273,1.3343646978\H,-0.0978334183,-2.2868540869,1.1786980869\H,-1.162

7701284,-2.2864896615,-0.2208781736\H,-2.4033115432,0.5042306622,0.172

9953703\H,-1.7731466586,-0.1168529882,-1.3471189728\H,-1.1862928559,1.

4169842458,-0.707268077\H,-0.807528445,0.5037146429,2.2702030896\H,0.8

254149846,-0.1177487469,2.0680024196\H,0.3656337347,1.4164461664,1.332

2609291\\Version=DEC-AXP-OSF/1-G94RevD.3\HF=-344.3594489\S2=0.761\S2-1

=0.\S2A=0.75\RMSD=2.411e-09\RMSF=2.570e-05\Dipole=-0.8706594,-0.594972

3,0.6621447\PG=C01 [X(C5H9O2)]\\@

MP2/6-311G**

1\1\GINC-GIUNDA\FOpt\UMP2-FC\6-311G(d,p)\C5H9O2(2)\ROOT\10-Mar-1998\0\

\#MP2=DIRECT/6-311G** GEOM=CHECKPOINT SCF=DIRECT OPT=(READFC) GUESS=CH

ECK\\the calculation of the ground state radical MeOCO\\0,2\C,1.670452

605,-0.7061954361,-0.0002944992\O,2.232463323,0.3479490713,-0.00012630

8\O,0.3935153946,-1.0359391817,-0.000250267\C,-0.6374582355,0.03692775

88,0.0000642117\C,-1.9349570539,-0.7554694559,0.0000222313\C,-0.497882

7934,0.8700130741,-1.2663989585\C,-0.4976481904,0.8694961373,1.2668414

611\H,-2.7857225743,-0.0677582805,0.0002419207\H,-1.9916124062,-1.3895

581778,0.8885923649\H,-1.9917772217,-1.3891942424,-0.8887969702\H,-1.3

294036127,1.5795348819,-1.3198598685\H,-0.5363668991,0.2221546581,-2.1

466472418\H,0.4384535905,1.430177692,-1.2742749991\H,-1.3291575927,1.5

78997862,1.320744617\H,-0.535971942,0.2212789179,2.1468326102\H,0.4386

90927,1.4296551038,1.2747734882\\Version=DEC-AXP-OSF/1-G94RevE.2\HF=-3

44.3558907\MP2=-345.4705012\PUHF=-344.3589683\PMP2-0=-345.4724942\S2=0

.762\S2-1=0.754\S2A=0.75\RMSD=3.345e-09\RMSF=1.167e-05\Dipole=-1.11134

1,0.2864048,0.000158\PG=C01 [X(C5H9O2)]\\@

QCISD/6-311G**//MP2/6-311G**

QCISD=-345.5285148

CCSD(T)/6-311G**//MP2/6-311G**

CCSD(T)=-345.5687778

B3LYP/6-311G**

1\1\GINC-ARGOLIS\FOpt\UB3LYP\6-311G(d,p)\C5H9O2(2)\BLONDIE\25-Jul-1998

\0\\#B3LYP/6-311G** GEOM=CHECKPOINT SCF=DIRECT OPT=READFC\\the calcula

tion of the ground state radical MeOCO\\0,2\C,1.4222431179,0.399248344

4,-1.0820160817\O,1.3168262528,1.5835014259,-1.0014841833\O,0.74418082

42,-0.5909844747,-0.5663782181\C,-0.4534271911,-0.3423104049,0.3449000

219\C,-0.8972619161,-1.7593751468,0.6822068997\C,-1.5140082269,0.41691

94965,-0.4455308275\C,0.0257171384,0.4163646997,1.5781379954\H,-1.7668

771168,-1.7286387974,1.3438693303\H,-0.0963390633,-2.304019376,1.18576

01104\H,-1.1691136458,-2.3036328616,-0.2241929929\H,-2.4127829086,0.52

69062185,0.1680292741\H,-1.7841823387,-0.131790421,-1.3504348209\H,-1.

1667517478,1.4114608597,-0.7251266858\H,-0.8052939445,0.526327047,2.28

07601329\H,0.825644489,-0.1327308208,2.0796738408\H,0.3880621271,1.410

9006081,1.3183729766\\Version=CrayXMP-Unicos-G94RevD.2\HF=-346.4512207

\S2=0.753\S2-1=0.\S2A=0.75\RMSD=3.692e-09\RMSF=8.045e-06\Dipole=-0.933

2975,-0.4984268,0.7099706\PG=C01 [X(C5H9O2)]\\@

**_______________________________________________________**

# Acetyl radical (8, R = Me)

UHF/6-311G**

1\1\GINC-DHARNYA\FOpt\UHF\6-311G(d,p)\C2H3O1(2)\SPEEDIE\05-Jan-1998\0\

\#UHF/6-311G** GEOM=CHECKPOINT SCF=DIRECT OPT\\the calculation of the

ground state radical MeCO\\0,2\C,-0.4899210548,0.,-0.0060660729\O,-0.5

205062049,0.,1.1505909339\C,0.6989647133,0.,-0.94028198\H,1.6252016309

,0.,-0.3758109793\H,0.6422930286,0.8763217194,-1.5754140872\H,0.642293

0286,-0.8763217194,-1.5754140872\\Version=DEC-AXP-OSF/1-G94RevD.3\Stat

e=2-A'\HF=-152.3393272\S2=0.762\S2-1=0.\S2A=0.75\RMSD=4.686e-09\RMSF=1

.074e-04\Dipole=0.5441281,0.,-0.9560212\PG=CS [SG(C2H1O1),X(H2)]\\@

MP2/6-311G**

1\1\GINC-DHARNYA\FOpt\UMP2-FC\6-311G(d,p)\C2H3O1(2)\SPEEDIE\24-Jan-199

8\0\\#MP2=DIRECT/6-311G** GEOM=CHECKPOINT SCF=DIRECT OPT=READFC\\the c

alculation of the ground state radical MeCO\\0,2\C,-0.506449857,0.,-0.

0211255515\O,-0.5106152294,0.,1.1652239364\C,0.7008988063,0.,-0.943246

8042\H,1.6309885219,0.,-0.36752909\H,0.6436198087,0.8822604766,-1.5840

141336\H,0.6436198087,-0.8822604766,-1.5840141336\\Version=DEC-AXP-OSF

/1-G94RevD.3\State=2-A'\HF=-152.3373184\MP2=-152.7993467\PUHF=-152.340

7014\PMP2-0=-152.8015267\S2=0.763\S2-1=0.754\S2A=0.75\RMSD=4.008e-09\R

MSF=6.742e-05\Dipole=0.5386017,0.,-0.6805663\PG=CS [SG(C2H1O1),X(H2)]\

\@

QCISD/6-311G**//MP2/6-311G**

QCISD=-152.823776

CCSD(T)/6-311G**//MP2/6-311G**

CCSD(T)=-152.8396748

B3LYP/6-311G**

1\1\GINC-DHARNYA\FOpt\UB3LYP\6-311G(d,p)\C2H3O1(2)\SPEEDIE\23-Jan-1998

\0\\#B3LYP/6-311G** GEOM=CHECKPOINT SCF=DIRECT OPT=READFC\\the calcula

tion of the ground state radical MeCO\\0,2\C,-0.4998851449,0.,-0.01796

0618\O,-0.5160943996,0.,1.1619642318\C,0.7005374575,0.,-0.940626921\H,

1.6361730765,0.,-0.3724929394\H,0.6443341221,0.8795072355,-1.585847840

7\H,0.6443341221,-0.8795072355,-1.5858478407\\Version=DEC-AXP-OSF/1-G9

4RevD.3\State=2-A'\HF=-153.2267669\S2=0.752\S2-1=0.\S2A=0.75\RMSD=2.88

7e-09\RMSF=5.411e-06\Dipole=0.548359,0.,-0.7780853\PG=CS [SG(C2H1O1),X

(H2)]\\@

MP2/cc-pVDZ

1\1\GINC-GIUNDA\FOpt\UMP2-FC\CC-pVDZ\C2H3O1(2)\BLONDIE\16-Sep-1998\0\\

#MP2=DIRECT/CC-PVDZ GEOM=CHECKPOINT SCF=DIRECT OPT\\this is an ethyl r

adical using 6-311G**\\0,2\C,-0.5077798688,0.,-0.0230688207\O,-0.51368

02072,0.,1.1712670425\C,0.7032624791,0.,-0.9458817843\H,1.6428694911,0

.,-0.368808625\H,0.646838252,0.8882239847,-1.5938120426\H,0.646838252,

-0.8882239847,-1.5938120426\\Version=DEC-AXP-OSF/1-G94RevE.2\HF=-152.3

094606\MP2=-152.7452249\PUHF=-152.3128971\PMP2-0=-152.7474236\S2=0.763

\S2-1=0.754\S2A=0.75\RMSD=5.399e-09\RMSF=3.932e-05\Dipole=0.5246549,0.

,-0.6591981\PG=CS [SG(C2H1O1),X(H2)]\\@

QCISD/cc-pVDZ//MP2/cc-pVDZ

QCISD=-152.7728259

CCSD(T)/cc-pVDZ//MP2/cc-pVDZ

CCSD(T)=-152.785656

MP2/aug-cc-pVDZ

1\1\GINC-GIUNDA\FOpt\UMP2-FC\Aug-CC-pVDZ\C2H3O1(2)\BLONDIE\19-Sep-1998

\0\\#MP2=DIRECT/AUG-CC-PVDZ GEOM=CHECKPOINT SCF=DIRECT OPT\\this is an

sing MeCOa-ccPVDZ\\0,2\C,-0.5026089761,0.,-0.0250294906\O,-0.518360540

8,0.,1.1727039091\C,0.7052630887,0.,-0.9462465066\H,1.6435489169,0.,-0

.3692052542\H,0.6437053673,0.8876804837,-1.5923850176\H,0.6437053673,-

0.8876804837,-1.5923850176\\Version=DEC-AXP-OSF/1-G94RevE.2\HF=-152.31

90484\MP2=-152.7751287\PUHF=-152.3224442\PMP2-0=-152.7773404\S2=0.764\

S2-1=0.754\S2A=0.75\RMSD=2.810e-09\RMSF=5.057e-05\Dipole=0.5996853,0.,

-0.761551\PG=CS [SG(C2H1O1),X(H2)]\\@

QCISD/aug-cc-pVDZ//MP2/aug-cc-pVDZ

QCISD=-152.801763

CCSD(T)/aug-cc-pVDZ//MP2/aug-cc-pVDZ

CCSD(T)=-152.8172427

MP2/aug-cc-pVTZ//MP2/aug-cc-pVDZ

MP2=-152.9049911

MP2/cc-pVTZ//MP2/aug-cc-pVDZ

MP2=-152.8931558

# _______________________________________________________

# Methyl Formate (10a)

UHF/6-311G**

1\1\GINC-CNET12\FOpt\UHF\6-311G(d,p)\C2H4O2\BLONDIE\03-Feb-1999\1\\#UH

F/6-311G** OPT=GRAD SCF=DIRECT\\THE CALCULATION OF THE GROUND STATE RA

DICAL MEOCO\\0,1\O\C,1,R2\O,2,R3,1,A3\H,2,R4,1,A4,3,180.,0\C,3,R5,2,A5

,1,0.,0\H,5,R6,3,A6,2,180.,0\H,5,R7,3,A7,6,D7,0\H,5,R7,3,A7,6,-D7,0\\R

2=1.17761847\R3=1.31521383\R4=1.08669007\R5=1.41869961\R6=1.07873026\R

7=1.08173781\A3=125.73759912\A4=124.38599678\A5=117.09502497\A6=105.83

201983\A7=110.47035609\D7=-119.47920468\\Version=DEC-AXP-OSF/1-G94RevE

.2\HF=-227.8512949\S2=0.\S2-1=0.\S2A=0.\RMSD=9.624e-09\RMSF=1.308e-04\

Dipole=0.4564799,0.,0.6319327\PG=CS [SG(C2H2O2),X(H2)]\\@

MP2/6-311G**

1\1\GINC-CNET12\FOpt\RMP2-FC\6-311G(d,p)\C2H4O2\BLONDIE\03-Feb-1999\1\

\#MP2=DIRECT/6-311G** GEOM=CHECKPOINT OPT=GRAD SCF=DIRECT\\THE CALCULA

TION OF THE GROUND STATE RADICAL MEOCO\\0,1\O\C,1,R2\O,2,R3,1,A3\H,2,R

4,1,A4,3,180.,0\C,3,R5,2,A5,1,0.,0\H,5,R6,3,A6,2,180.,0\H,5,R7,3,A7,6,

D7,0\H,5,R7,3,A7,6,-D7,0\\R2=1.20526542\R3=1.34226869\R4=1.09790848\R5

=1.4364315\R6=1.08747521\R7=1.09119365\A3=125.79072567\A4=125.48732788

\A5=113.77814812\A6=105.40285976\A7=110.47861233\D7=-119.65447815\\Ver

sion=DEC-AXP-OSF/1-G94RevE.2\HF=-227.8480907\MP2=-228.528473\RMSD=8.99

9e-09\RMSF=1.291e-04\Dipole=0.4396346,0.,0.4717943\PG=CS [SG(C2H2O2),X

(H2)]\\@

QCISD/6-311G**//MP2/6-311G**

QCISD=-228.5529754

CCSD(T)/6-311G**//MP2/6-311G**

CCSD(T)=-228.575657

B3LYP/6-311G**

1\1\GINC-CNET13\FOpt\RB3LYP\6-311G(d)\C2H4O2\BLONDIE\02-Feb-1999\1\\#B

3LYP/6-311G* GEOM=CHECKPOINT OPT=GRAD SCF=DIRECT\\THE CALCULATION OF T

HE GROUND STATE RADICAL MEOCO\\0,1\O\C,1,R2\O,2,R3,1,A3\H,2,R4,1,A4,3,

180.,0\C,3,R5,2,A5,1,0.,0\H,5,R6,3,A6,2,180.,0\H,5,R7,3,A7,6,D7,0\H,5,

R7,3,A7,6,-D7,0\\R2=1.19955294\R3=1.34041137\R4=1.09953991\R5=1.440004

75\R6=1.08707249\R7=1.09058811\A3=126.03369249\A4=125.12923083\A5=115.

62910228\A6=105.52092401\A7=110.46585805\D7=-119.61149036\\Version=DEC

-AXP-OSF/1-G94RevE.2\HF=-229.125452\RMSD=5.420e-09\RMSF=1.734e-04\Dipo

le=0.4862507,0.,0.540134\PG=CS [SG(C2H2O2),X(H2)]\\@

MP2/cc-pVDZ

1\1\GINC-CNET12\FOpt\RMP2-FC\CC-pVDZ\C2H4O2\BLONDIE\29-Jan-1999\1\\#MP

2=DIRECT/CC-PVDZ GEOM=CHECKPOINT OPT=GRAD SCF=DIRECT\\THE CALCULATION

OF THE GROUND STATE RADICAL MEOCO\\0,1\O\C,1,R2\O,2,R3,1,A3\H,2,R4,1,A

4,3,180.,0\C,3,R5,2,A5,1,0.,0\H,5,R6,3,A6,2,180.,0\H,5,R7,3,A7,6,D7,0\

H,5,R7,3,A7,6,-D7,0\\R2=1.21092835\R3=1.34812383\R4=1.10810864\R5=1.43

901464\R6=1.09676889\R7=1.10059179\A3=125.76616033\A4=125.64062048\A5=

113.50631928\A6=105.57107142\A7=110.69815525\D7=-119.66724692\\Version

=DEC-AXP-OSF/1-G94RevE.2\HF=-227.8035614\MP2=-228.4443234\RMSD=4.736e-

09\RMSF=4.798e-05\Dipole=0.429014,0.,0.4616261\PG=CS [SG(C2H2O2),X(H2)

]\\@

QCISD/cc-pVDZ//MP2/cc-pVDZ

QCISD=-228.4736208

CCSD(T)/cc-pVDZ//MP2/cc-pVDZ

CCSD(T)=-228.4917561

MP2/aug-cc-pVDZ

1\1\GINC-CNET10\FOpt\RMP2-FC\Aug-CC-pVDZ\C2H4O2\BLONDIE\29-Jan-1999\1\

\#MP2=DIRECT/AUG-CC-PVDZ GEOM=CHECKPOINT OPT=GRAD SCF=DIRECT\\THE CALC

ULATION OF THE GROUND STATE RADICAL MEOCO\\0,1\O\C,1,R2\O,2,R3,1,A3\H,

2,R4,1,A4,3,180.,0\C,3,R5,2,A5,1,0.,0\H,5,R6,3,A6,2,180.,0\H,5,R7,3,A7

,6,D7,0\H,5,R7,3,A7,6,-D7,0\\R2=1.21809058\R3=1.3523949\R4=1.10363139\

R5=1.45164847\R6=1.09509374\R7=1.09854076\A3=125.62148842\A4=125.15699

687\A5=113.78514342\A6=105.14245058\A7=110.07380475\D7=-119.62498277\\

Version=DEC-AXP-OSF/1-G94RevE.2\HF=-227.8184766\MP2=-228.4959071\RMSD=

4.499e-09\RMSF=8.986e-05\Dipole=0.4645085,0.,0.5331532\PG=CS [SG(C2H2O

2),X(H2)]\\@

QCISD/aug-cc-pVDZ//MP2/aug-cc-pVDZ

QCISD=-228.5230471

CCSD(T)/aug-cc-pVDZ//MP2/aug-cc-pVDZ

CCSD(T)=-228.5456318

MP2/aug-cc-pVTZ//MP2/aug-cc-pVDZ//

MP2=-228.6943255

MP2/cc-pVTZ//MP2/aug-cc-pVDZ//

MP2=-228.6754923

# _______________________________________________________

# Acetaldehyde (10b)

UHF/6-311G**

1\1\GINC-ARGOLIS\FOpt\UHF\6-311G(d,p)\C2H4O1\BLONDIE\09-Sep-1998\0\\#U

HF/6-311G** SCF=DIRECT OPT\\the calculation of the ground state radica

l MeCO\\0,1\C,-0.4618667716,0.,0.0073779915\O,-0.3836927808,0.,1.18661

88523\C,0.7169538204,0.,-0.9257902575\H,1.6415758283,0.,-0.3640230122\

H,0.6714456833,0.8756822181,-1.5681992119\H,0.6714456833,-0.8756822181

,-1.5681992119\H,-1.4454472412,0.,-0.4820557862\\Version=CrayXMP-Unico

s-G94RevD.2\State=1-A'\HF=-152.9579156\S2=0.\S2-1=0.\S2A=0.\RMSD=5.428

e-09\RMSF=3.269e-05\Dipole=0.0782323,0.,-1.1691963\PG=CS [SG(C2H2O1),X

(H2)]\\@

MP2/6-311G**

1\1\GINC-ARGOLIS\FOpt\RMP2-FC\6-311G(d,p)\C2H4O1\BLONDIE\10-Sep-1998\0

\\#MP2=DIRECT/6-311G** SCF=DIRECT OPT=READFC GEOM=CHECKPOINT\\the calc

ulation of the ground state radical MeCO\\0,1\C,-0.4640865363,0.,-0.00

14148763\O,-0.3822651,0.,1.2081097009\C,0.7181815709,0.,-0.9368004919\

H,1.6474574837,0.,-0.3660722112\H,0.6713826896,0.8820089611,-1.5841137

787\H,0.6713826896,-0.8820089611,-1.5841137787\H,-1.45667227,0.,-0.501

2856292\\Version=CrayXMP-Unicos-G94RevD.2\State=1-A'\HF=-152.9559383\M

P2=-153.442579\RMSD=3.165e-09\RMSF=1.277e-04\Dipole=0.083755,0.,-0.970

0937\PG=CS [SG(C2H2O1),X(H2)]\\@

QCISD/6-311G**//MP2/6-311G**

QCISD=-153.4689287

CCSD(T)/6-311G**//MP2/6-311G**

CCSD(T)=-153.4853339

B3LYP/6-311G**

1\1\GINC-CNET13\FOpt\RB3LYP\6-311G(d,p)\C2H4O1\BLONDIE\03-Feb-1999\0\\

#B3LYP/6-311G** OPT=GRAD SCF=DIRECT GEOM=CHECKPOINT\\this is a calc of

\\0,1\C,-0.4621060536,0.,0.0019434659\O,-0.3854338983,0.,1.2033577208\

C,0.7189614487,0.,-0.9330397528\H,1.6515671091,0.,-0.3691235223\H,0.67

34062466,0.8788376756,-1.5854475614\H,0.6734062466,-0.8788376756,-1.58

54475614\H,-1.4560407866,0.,-0.5002653993\\Version=DEC-AXP-OSF/1-G94Re

vE.2\HF=-153.8768578\RMSD=8.800e-09\RMSF=6.453e-05\Dipole=0.1088558,0.

,-1.0414756\PG=CS [SG(C2H2O1),X(H2)]\\@

MP2/cc-pVDZ

1\1\ CSIRO-CHERAX\FOpt\RMP2-FC\CC-pVDZ\C2H4O1\MEMAS\26-Oct-1998\0\\#MP

2=DIRECT/CC-PVDZ GEOM=CHECKPOINT OPT=CALCFC SCF=DIRECT\\this is a calc

of the ground state MeCOH\\0,1\C,-0.4642026484,0.,-0.0015863296\O,-0.

3831697428,0.,1.2139021953\C,0.7187371469,0.,-0.9395599294\H,1.6575589

518,0.,-0.3676788912\H,0.6720958415,0.8875871769,-1.5934777462\H,0.672

0958415,-0.8875871769,-1.5934777462\H,-1.4635996833,0.,-0.5097056245\\

Version=CrayXMP-Unicos-G94RevB.3\State=1-A'\HF=-152.9269116\MP2=-153.3

862625\RMSD=1.506e-09\RMSF=9.623e-05\Dipole=0.0914071,0.,-0.9376737\PG

=CS [SG(C2H2O1),X(H2)]\\@

QCISD/cc-pVDZ//MP2/cc-pVDZ

QCISD=-153.4157718

CCSD(T)/cc-pVDZ//MP2/cc-pVDZ

CCSD(T)=-153.4290031

MP2/aug-cc-pVDZ

1\1\ CSIRO-CHERAX\FOpt\RMP2-FC\CC-pVDZ\C2H4O1\MEMAS\01-Nov-1998\0\\#MP

2=DIRECT/AUG-CC-PVDZ GEOM=CHECKPOINT OPT=(READFC) SCF=DIRECT\\this is

a calc of the ground state MeCOH\\0,1\C,-0.4644043458,0.,-0.0079581887

\O,-0.3861441791,0.,1.2155400367\C,0.7227834683,0.,-0.9374717596\H,1.6

608790292,0.,-0.3669475428\H,0.6719804841,0.8865098777,-1.5915840069\H

,0.6719804841,-0.8865098777,-1.5915840069\H,-1.4659613,0.,-0.501625047

1\\Version=CrayXMP-Unicos-G94RevB.3\State=1-A'\HF=-152.9366105\MP2=-15

3.4183187\RMSD=7.048e-09\RMSF=1.350e-05\Dipole=0.1107248,0.,-1.1004235

\PG=CS [SG(C2H2O1),X(H2)]\\@

QCISD/aug-cc-pVDZ//MP2/aug-cc-pVDZ

QCISD=-153.4466372

CCSD(T)/aug-cc-pVDZ//MP2/aug-cc-pVDZ

CCSD(T)=-153.4627545

MP2/aug-cc-pVTZ//MP2/aug-cc-pVDZ

MP2=-153.553754

MP2/cc-pVTZ//MP2/aug-cc-pVDZ

MP2=-153.5414587

**__________________________________________________**

# (Methoxy)thioacyl radical (12, R = Me)

UHF/6-311G**

1\1\ CSIRO-CHERAX\FOpt\UHF\6-311G(d,p)\C2H3O1S1(2)\MEMAS\27-Jan-1999\1

\\#UHF/6-311G** OPT=(GRAD) SCF=DIRECT\\this is a calc of MeOCS using a

ccpvd basis set\\0,2\S\C,1,R2\O,2,R3,1,A3\C,3,R4,2,A4,1,0.,0\H,4,R5,3

,A5,2,180.,0\H,4,R6,3,A6,2,D6,0\H,4,R6,3,A6,2,-D6,0\\R2=1.59845876\R3=

1.26881131\R4=1.43516677\R5=1.07735978\R6=1.08058597\A3=136.86173991\A

4=120.24233822\A5=105.50814278\A6=109.38751132\D6=60.47412402\\Version

=CrayXMP-Unicos-G94RevB.3\State=2-A'\HF=-549.8449042\S2=0.779\S2-1=0.\

S2A=0.751\RMSD=6.235e-09\RMSF=8.172e-05\Dipole=1.2032281,0.,0.6590763\

PG=CS [SG(C2H1O1S1),X(H2)]\\@

MP2/6-311G**

1\1\ CSIRO-CHERAX\FOpt\UMP2-FC\6-311G(d,p)\C2H3O1S1(2)\MEMAS\28-Jan-19

99\1\\#MP2=DIRECT/6-311G** GEOM=CHECKPOINT OPT=(GRAD) SCF=DIRECT\\this

is a calc of MeOCS using a ccpvd basis set\\0,2\S\C,1,R2\O,2,R3,1,A3\

C,3,R4,2,A4,1,0.,0\H,4,R5,3,A5,2,180.,0\H,4,R6,3,A6,2,D6,0\H,4,R6,3,A6

,2,-D6,0\\R2=1.59521786\R3=1.29500943\R4=1.45212931\R5=1.08704864\R6=1

.09088708\A3=135.3759582\A4=116.57452309\A5=105.66325886\A6=109.036647

7\D6=60.06721549\\Version=CrayXMP-Unicos-G94RevB.3\State=2-A'\HF=-549.

843336\MP2=-550.4333745\PUHF=-549.8475776\PMP2-0=-550.4366227\S2=0.782

\S2-1=0.767\S2A=0.751\RMSD=5.404e-09\RMSF=2.851e-05\Dipole=1.2088845,0

.,0.2767403\PG=CS [SG(C2H1O1S1),X(H2)]\\@

QCISD/6-311G**//MP2/6-311G**

QCISD=-550.4693715

CCSD(T)/6-311G**//MP2/6-311G**

CCSD(T)=-550.4922007

B3LYP/6-311G**

1\1\ CSIRO-CHERAX\FOpt\UB3LYP\6-311G(d,p)\C2H3O1S1(2)\MEMAS\01-Mar-199

9\1\\#B3LYP/6-311G** GEOM=CHECKPOINT OPT=(GRAD) SCF=DIRECT\\this is a

calc of MeOCS using a ccpvd basis set\\0,2\S\C,1,R2\O,2,R3,1,A3\C,3,R4

,2,A4,1,0.,0\H,4,R5,3,A5,2,180.,0\H,4,R6,3,A6,2,D6,0\H,4,R6,3,A6,2,-D6

,0\\R2=1.60954249\R3=1.28743018\R4=1.46712516\R5=1.08631357\R6=1.08996

887\A3=136.15529534\A4=119.44252695\A5=105.44754224\A6=108.94788018\D6

=60.27169171\\Version=CrayXMP-Unicos-G94RevB.3\State=2-A'\HF=-551.4197

682\S2=0.755\S2-1=0.\S2A=0.75\RMSD=4.877e-09\RMSF=2.400e-04\Dipole=1.2

228115,0.,0.4062453\PG=CS [SG(C2H1O1S1),X(H2)]\\@

MP2/cc-pVDZ

1\1\ CSIRO-CHERAX\FOpt\UMP2-FC\CC-pVDZ\C2H3O1S1(2)\MELMW\28-Jan-1999\1

\\#MP2=DIRECT/CC-PVDZ GEOM=CHECKPOINT OPT=(GRAD) SCF=DIRECT\\this is a

calc of MeOCS-ccpvdz\\0,2\S\C,1,R2\O,2,R3,1,A3\C,3,R4,2,A4,1,0.,0\H,4

,R5,3,A5,2,180.,0\H,4,R6,3,A6,2,D6,0\H,4,R6,3,A6,2,-D6,0\\R2=1.6095187

2\R3=1.30105891\R4=1.45709959\R5=1.09654984\R6=1.10021944\A3=135.38753

295\A4=116.5581362\A5=105.7278036\A6=109.03879919\D6=60.03418616\\Vers

ion=CrayXMP-Unicos-G94RevB.3\State=2-A'\HF=-549.8134835\MP2=-550.37800

39\PUHF=-549.8178933\PMP2-0=-550.3813769\S2=0.784\S2-1=0.768\S2A=0.751

\RMSD=5.239e-09\RMSF=3.835e-05\Dipole=1.1681457,0.,0.3051526\PG=CS [SG

(C2H1O1S1),X(H2)]\\@

QCISD/cc-pVDZ//MP2/cc-pVDZ

QCISD=-550.4165721

CCSD(T)/cc-pVDZ//MP2/cc-pVDZ

CCSD(T)=-550.4361135

MP2/aug-cc-pVDZ

1\1\ CSIRO-CHERAX\FOpt\UMP2-FC\CC-pVDZ\C2H3O1S1(2)\MELMW\29-Jan-1999\1

\\#MP2=DIRECT/AUG-CC-PVDZ GEOM=CHECKPOINT OPT=(GRAD) SCF=DIRECT\\this

is a calc of MeOCS-ccpvdz\\0,2\S\C,1,R2\O,2,R3,1,A3\C,3,R4,2,A4,1,0.,0

\H,4,R5,3,A5,2,180.,0\H,4,R6,3,A6,2,D6,0\H,4,R6,3,A6,2,-D6,0\\R2=1.613

41582\R3=1.30376785\R4=1.46971481\R5=1.09488746\R6=1.09849472\A3=135.1

1341021\A4=116.55099797\A5=105.3164639\A6=108.50488339\D6=60.03133081\

\Version=CrayXMP-Unicos-G94RevB.3\State=2-A'\HF=-549.8251006\MP2=-550.

4206203\PUHF=-549.8297475\PMP2-0=-550.4241909\S2=0.788\S2-1=0.77\S2A=0

.751\RMSD=2.780e-09\RMSF=1.779e-04\Dipole=1.1682632,0.,0.296101\PG=CS

[SG(C2H1O1S1),X(H2)]\\@

QCISD/aug-cc-pVDZ//MP2/aug-cc-pVDZ

QCISD=-550.4583084

CCSD(T)/aug-cc-pVDZ//MP2/aug-cc-pVDZ

CCSD(T)=-550.482288

**__________________________________________________**

**(Methylthio)acyl radical (13 R = Me)**

# UHF/6-311G**

1\1\GINC-CNET8\FOpt\UHF\6-311G(d,p)\C2H3O1S1(2)\ROOT\03-Dec-1998\1\\#U

HF/6-311G** OPT=(GRAD,READFC) GEOM=CHECKPOINT GUESS=CHECK SCF=DIRECT\\

1st radical b test\\0,2\S\C,1,r1\O,2,r2,1,a1\C,1,r3,2,a2,3,180.,0\H,4,

r4,1,a3,2,180.,0\H,4,r5,1,a4,2,d1,0\H,4,r5,1,a4,2,-d1,0\\r1=1.80279659

\r2=1.14671956\r3=1.81502682\r4=1.08175797\r5=1.07998202\a1=128.407984

38\a2=99.17600506\a3=106.0655713\a4=110.72805912\d1=61.48898117\\Versi

on=DEC-AXP-OSF/1-G94RevE.2\HF=-549.8760823\S2=0.773\S2-1=0.\S2A=0.75\R

MSD=4.727e-09\RMSF=8.797e-05\Dipole=-1.0469198,0.,-0.6931821\PG=CS [SG

(C2H1O1S1),X(H2)]\\@

# MP2/6-311G**

1\1\GINC-CNET8\FOpt\UMP2-FC\6-311G(d,p)\C2H3O1S1(2)\ROOT\03-Dec-1998\1

\\#MP2/6-311G** OPT=(GRAD,READFC) GEOM=CHECKPOINT GUESS=CHECK SCF=DIRE

CT\\1st radical b test\\0,2\S\C,1,r1\O,2,r2,1,a1\C,1,r3,2,a2,3,180.,0\

H,4,r4,1,a3,2,180.,0\H,4,r5,1,a4,2,d1,0\H,4,r5,1,a4,2,-d1,0\\r1=1.7784

8368\r2=1.18330492\r3=1.80847209\r4=1.09121014\r5=1.08908161\a1=128.50

40897\a2=97.8545263\a3=106.27825493\a4=110.95649961\d1=61.54501113\\Ve

rsion=DEC-AXP-OSF/1-G94RevE.2\HF=-549.8733614\MP2=-550.4696579\PUHF=-5

49.8779638\PMP2-0=-550.4726462\S2=0.771\S2-1=0.756\S2A=0.75\RMSD=8.977

e-09\RMSF=3.735e-05\Dipole=-0.793381,0.,-0.6148323\PG=CS [SG(C2H1O1S1)

,X(H2)]\\@

## QCISD/6-311G**//MP2/6-311G**

QCISD=-550.5034938

## CCSD(T)/6-311G**//MP2/6-311G**

CCSD(T)=-550.5258741

## MP2/cc-pVDZ

1\1\GINC-ARGOLIS\FOpt\UMP2-FC\CC-pVDZ\C2H3O1S1(2)\CARLS\18-Dec-1998\1\

\#MP2=DIRECT/CC-PVDZ OPT=(GRAD,READFC) GEOM=CHECKPOINT GUESS=CHECK SCF

=DIRECT\\radical b S-C=O mp2/cc-pvdz test\\0,2\S\C,1,r1\O,2,r2,1,a1\C,

1,r3,2,a2,3,180.,0\H,4,r4,1,a3,2,180.,0\H,4,r5,1,a4,2,d1,0\H,4,r5,1,a4

,2,-d1,0\\r1=1.80069049\r2=1.18863407\r3=1.82153179\r4=1.10037558\r5=1

.09908939\a1=128.93630924\a2=97.12638873\a3=106.28207767\a4=110.675327

87\d1=61.35584515\\Version=CrayXMP-Unicos-G94RevD.2\State=2-A'\HF=-549

.842385\MP2=-550.4127104\PUHF=-549.8473771\PMP2-0=-550.4159992\S2=0.77

4\S2-1=0.757\S2A=0.75\RMSD=9.078e-09\RMSF=3.198e-05\Dipole=-0.7598276,

0.,-0.5549054\PG=CS [SG(C2H1O1S1),X(H2)]\\@

## QCISD/cc-pVDZ//MP2/cc-pVDZ

QCISD=-550.4486406

## CCSD(T)/cc-pVDZ//MP2/cc-pVDZ

CCSD(T)=-550.4675

## MP2/aug-cc-pVDZ

1\1\ CSIRO-CHERAX\FOpt\UMP2-FC\CC-pVDZ\C2H3O1S1(2)\MEMAS\28-Jan-1999\1

\\#MP2=DIRECT/AUG-CC-PVDZ OPT=(GRAD,READFC) GEOM=CHECKPOINT GUESS=CHEC

K SCF=DIRECT\\radical b S=C=O mp2/aug-cc-pvdz test\\0,2\S\C,1,r1\O,2,r

2,1,a1\C,1,r3,2,a2,3,180.,0\H,4,r4,1,a3,2,180.,0\H,4,r5,1,a4,2,d1,0\H,

4,r5,1,a4,2,-d1,0\\r1=1.79164709\r2=1.19375276\r3=1.82846464\r4=1.0993

7092\r5=1.09713793\a1=128.95086609\a2=97.76446346\a3=106.06021037\a4=1

10.27599028\d1=61.43385239\\Version=CrayXMP-Unicos-G94RevB.3\State=2-A

'\HF=-549.8543097\MP2=-550.4545023\PUHF=-549.8591542\PMP2-0=-550.45770

85\S2=0.774\S2-1=0.758\S2A=0.75\RMSD=9.179e-09\RMSF=1.025e-05\Dipole=-

0.8551188,0.,-0.6923397\PG=CS [SG(C2H1O1S1),X(H2)]\\@

## QCISD/aug-cc-pVDZ//MP2/aug-cc-pVDZ

QCISD=-550.490316

## CCSD(T)/aug-cc-pVDZ//MP2/aug-cc-pVDZ

CCSD(T)=-550.5137783

**_______________________________________________________**

**(Methylthio)thioacyl radical (14, R = Me)**

# UHF/6-311G**

1\1\GINC-CNET12\FOpt\UHF\6-311G(d,p)\C2H3S2(2)\ROOT\07-Dec-1998\1\\#UH

F/6-311G** OPT=(GRAD,READFC) GEOM=CHECKPOINT GUESS=CHECK SCF=DIRECT\\1

st sulphur radical a test\\0,2\S\C,1,r1\S,2,r2,1,a1\C,1,r3,2,a2,3,0.,0

\H,4,r4,1,a3,2,180.,0\H,4,r5,1,a4,2,d1,0\H,4,r5,1,a4,2,-d1,0\\r1=1.676

57407\r2=1.57176488\r3=1.82205139\r4=1.08213647\r5=1.08019581\a1=142.9

9414151\a2=104.25428004\a3=106.18071824\a4=109.98657819\d1=60.95995583

\\Version=DEC-AXP-OSF/1-G94RevE.2\HF=-872.509362\S2=0.781\S2-1=0.\S2A=

0.751\RMSD=5.251e-09\RMSF=1.297e-04\Dipole=0.6201895,0.,-1.040449\PG=C

S [SG(C2H1S2),X(H2)]\\@

# MP2/6-311G**

1\1\GINC-CNET6\FOpt\UMP2-FC\6-311G(d,p)\C2H3S2(2)\ROOT\09-Dec-1998\1\\

#MP2=DIRECT/6-311G** OPT=(GRAD,READFC) GEOM=CHECKPOINT GUESS=CHECK SCF

=DIRECT\\1st sulphur radical a test\\0,2\S\C,1,r1\S,2,r2,1,a1\C,1,r3,2

,a2,3,0.,0\H,4,r4,1,a3,2,180.,0\H,4,r5,1,a4,2,d1,0\H,4,r5,1,a4,2,-d1,0

\\r1=1.65892928\r2=1.57918668\r3=1.81755861\r4=1.09175134\r5=1.0909162

7\a1=139.58538103\a2=103.83460307\a3=107.78031008\a4=109.68156436\d1=6

0.34092987\\Version=DEC-AXP-OSF/1-G94RevE.2\HF=-872.5085227\MP2=-873.0

435453\PUHF=-872.5131322\PMP2-0=-873.0468251\S2=0.779\S2-1=0.762\S2A=0

.751\RMSD=4.445e-09\RMSF=6.649e-05\Dipole=0.765669,0.,-0.8223363\PG=CS

[SG(C2H1S2),X(H2)]\\@

## QCISD/6-311G**//MP2/6-311G**

QCISD=-873.0870393

## CCSD(T)/6-311G**//MP2/6-311G**

CCSD(T)=-873.110393

## MP2/cc-pVDZ

1\1\ CSIRO-CHERAX\FOpt\UMP2-FC\CC-pVDZ\C2H3S2(2)\MEMAS\29-Jan-1999\1\\

#MP2=DIRECT/CC-PVDZ OPT=(GRAD,READFC) GEOM=CHECKPOINT GUESS=CHECK SCF=

DIRECT\\1st sulphur radical a mp2/cc-pvdz test\\0,2\S\C,1,r1\S,2,r2,1,

a1\C,1,r3,2,a2,3,0.,0\H,4,r4,1,a3,2,180.,0\H,4,r5,1,a4,2,d1,0\H,4,r5,1

,a4,2,-d1,0\\r1=1.67745129\r2=1.59529925\r3=1.83052891\r4=1.10123558\r

5=1.10094796\a1=138.47287558\a2=104.04492295\a3=107.58605804\a4=109.30

508513\d1=60.21517857\\Version=CrayXMP-Unicos-G94RevB.3\State=2-A'\HF=

-872.488541\MP2=-873.0096003\PUHF=-872.4933709\PMP2-0=-873.0130737\S2=

0.781\S2-1=0.763\S2A=0.751\RMSD=6.236e-09\RMSF=1.610e-04\Dipole=0.7278

896,0.,-0.8034798\PG=CS [SG(C2H1S2),X(H2)]\\@

## QCISD/cc-pVDZ//MP2/cc-pVDZ

QCISD=-873.0540537

## CCSD(T)/cc-pVDZ//MP2/cc-pVDZ

CCSD(T)=-873.075161

## MP2/aug-cc-pVDZ

1\1\ CSIRO-CHERAX\FOpt\UMP2-FC\CC-pVDZ\C2H3S2(2)\MEMAS\01-Feb-1999\1\\

#MP2=DIRECT/AUG-CC-PVDZ OPT=(GRAD,READFC) GEOM=CHECKPOINT GUESS=CHECK

SCF=DIRECT\\1st sulphur radical a mp2/aug-cc-pvdz test\\0,2\S\C,1,r1\S

,2,r2,1,a1\C,1,r3,2,a2,3,0.,0\H,4,r4,1,a3,2,180.,0\H,4,r5,1,a4,2,d1,0\

H,4,r5,1,a4,2,-d1,0\\r1=1.68010436\r2=1.5993384\r3=1.83549073\r4=1.099

81202\r5=1.0991781\a1=136.99087092\a2=103.66527759\a3=107.52125392\a4=

108.89942956\d1=60.1892282\\Version=CrayXMP-Unicos-G94RevB.3\State=2-A

'\HF=-872.4964568\MP2=-873.0449596\PUHF=-872.5015409\PMP2-0=-873.04862

8\S2=0.784\S2-1=0.765\S2A=0.751\RMSD=9.330e-09\RMSF=1.176e-04\Dipole=0

.7245675,0.,-0.8423395\PG=CS [SG(C2H1S2),X(H2)]\\@

## QCISD/aug-cc-pVDZ//MP2/aug-cc-pVDZ

QCISD=-873.0890281

## CCSD(T)/aug-cc-pVDZ//MP2/aug-cc-pVDZ

**CCSD(T)=-873.1146603**

**_______________________________________________________**

# Transition State (15)

UHF/6-311G**

1\1\GINC-DHARNYA\FTS\UHF\6-311G(d,p)\C2H3O1(2)\SPEEDIE\08-Jan-1998\1\\

#UHF/6-311G** SCF=DIRECT OPT=(EF,TS)\\the calculation of the ground st

ate radical MeCO\\0,2\C\O,1,R2\C,1,R3,2,A3\H,3,R4,1,A4,2,180.,0\H,3,R5

,1,A5,2,D5,0\H,3,R5,1,A5,2,-D5,0\\R2=1.12564025\R3=1.98905512\R4=1.075

52581\R5=1.07805311\A3=116.72177078\A4=105.24117499\A5=101.34738315\D5

=59.37403523\\Version=DEC-AXP-OSF/1-G94RevD.3\State=2-A'\HF=-152.31606

71\S2=0.809\S2-1=0.\S2A=0.751\RMSD=7.878e-09\RMSF=7.420e-05\Dipole=0.4

601453,0.,-0.4580947\PG=CS [SG(C2H1O1),X(H2)]\\@

MP2/6-311G**

1\1\GINC-ARGOLIS\FTS\UMP2-FC\6-311G(d,p)\C2H3O1(2)\BLONDIE\30-Jan-1998

\1\\#MP2=DIRECT/6-311G** OPT=(EF,TS) SCF=DIRECT\\the calculation of th

e ground state radical MeCO\\0,2\C\O,1,R2\C,1,R3,2,A3\H,3,R4,1,A4,2,18

0.,0\H,3,R5,1,A5,2,D5,0\H,3,R5,1,A5,2,-D5,0\\R2=1.15023406\R3=2.102574

59\R4=1.08206352\R5=1.08442356\A3=115.53756147\A4=103.03822826\A5=99.4

6983392\D5=59.50451974\\Version=CrayXMP-Unicos-G94RevD.2\State=2-A'\HF

=-152.3152502\MP2=-152.7675004\PUHF=-152.3230938\PMP2-0=-152.7735705\S

2=0.81\S2-1=0.783\S2A=0.751\RMSD=5.693e-09\RMSF=1.761e-05\Dipole=0.322

8691,0.,-0.1489778\PG=CS [SG(C2H1O1),X(H2)]\\@

QCISD/6-311G**//MP2/6-311G**

QCISD=-152.797342

CCSD(T)/6-311G**//MP2/6-311G**

CCSD(T)=-152.8135166

B3LYP/6-311G**

1\1\GINC-DHARNYA\PTS\UB3LYP\6-311G(d,p)\C2H3O1(2)\HERB\30-Dec-1998\1\\

#B3LYP/6-311G** SCF=DIRECT OPT=(EF,TS)\\this is a calc of MeCO_aeTSB3L

Y\\0,2\C\O,1,R2\C,1,R3,2,A3\H,3,R4,1,A4,2,D4,0\H,3,R5,1,A5,2,D5,0\H,3,

R5,1,A5,2,-D5,0\\D4=179.99995078\R2=1.13847064\R3=2.28142391\R4=1.0807

297\R5=1.08253345\A3=114.5472589\A4=99.80721063\A5=97.27841155\D5=59.7

1266638\\Version=DEC-AXP-OSF/1-G94RevD.3\HF=-153.1962375\S2=0.76\S2-1=

0.\S2A=0.75\RMSD=9.681e-09\RMSF=5.348e-06\Dipole=0.3321969,-0.0000001,

-0.2027683\PG=C01 [X(C2H3O1)]\\@

MP2/cc-pVDZ

Symmetry A" KE= 2.917164900373D+00

1\1\GINC-GIUNDA\FTS\UMP2-FC\CC-pVDZ\C2H3O1(2)\BLONDIE\16-Sep-1998\1\\#

MP2=DIRECT/CC-PVDZ GEOM=CHECKPOINT SCF=DIRECT OPT=(EF,TS)\\this is an

ethyl radical using cc-pVDZ\\0,2\C\O,1,R2\C,1,R3,2,A3\H,3,R4,1,A4,2,18

0.,0\H,3,R5,1,A5,2,D5,0\H,3,R5,1,A5,2,-D5,0\\R2=1.15844824\R3=2.102189

49\R4=1.0923088\R5=1.09450663\A3=116.06860848\A4=103.10960673\A5=99.65

200579\D5=59.49460191\\Version=DEC-AXP-OSF/1-G94RevE.2\HF=-152.28661\M

P2=-152.713054\PUHF=-152.2945348\PMP2-0=-152.7192013\S2=0.812\S2-1=0.7

84\S2A=0.751\RMSD=6.580e-09\RMSF=1.294e-05\Dipole=0.3165773,0.,-0.1463

145\PG=CS [SG(C2H1O1),X(H2)]\\@

QCISD/cc-pVDZ//MP2/cc-pVDZ

QCISD=-152.7463083

CCSD(T)/cc-pVDZ//MP2/cc-pVDZ

CCSD(T)=-152.7595082

MP2/aug-cc-pVDZ

1\GINC-GIUNDA\FTS\UMP2-FC\Aug-CC-pVDZ\C2H3O1(2)\BLONDIE\18-Sep-1998\

1\\#MP2=DIRECT/AUG-CC-PVDZ GEOM=CHECKPOINT SCF=DIRECT OPT=(EF,TS)\\thi

s is an ethyl radical using cc-pVDZ\\0,2\C\O,1,R2\C,1,R3,2,A3\H,3,R4,1

,A4,2,180.,0\H,3,R5,1,A5,2,D5,0\H,3,R5,1,A5,2,-D5,0\\R2=1.16173965\R3=

2.12097613\R4=1.0901491\R5=1.0925092\A3=115.67330251\A4=102.11578059\A

5=98.75233811\D5=59.58348129\\Version=DEC-AXP-OSF/1-G94RevE.2\HF=-152.

2942981\MP2=-152.7410961\PUHF=-152.3021611\PMP2-0=-152.7472157\S2=0.81

2\S2-1=0.784\S2A=0.751\RMSD=4.465e-09\RMSF=4.119e-05\Dipole=0.3376343,

0.,-0.1991182\PG=CS [SG(C2H1O1),X(H2)]\\@

QCISD/aug-cc-pVDZ//MP2/aug-cc-pVDZ

QCISD=-152.7735204

CCSD(T)/aug-cc-pVDZ//MP2/aug-cc-pVDZ

CCSD(T)=-152.789544

MP2/aug-cc-pVTZ//MP2/aug-cc-pVDZ

MP2=-152.8693544

MP2/cc-pVTZ//MP2/aug-cc-pVDZ

MP2=-152.8585388

**_______________________________________________________**

# Transition State (16, R = Me)

UHF/6-311G**

1\1\GINC-YTTERBIUM\FTS\UHF\6-311G(d,p)\C2H3O2(2)\SPEEDIE\18-Dec-1997\1

\\#UHF/6-311G** GEOM=CHECKPOINT SCF=QC OPT=(READFC,EF,TS)\\the calcula

tion of the ground state radical MeOCO\\0,2\O\C,1,R2\O,2,R3,1,A3\C,3,R

4,2,A4,1,180.,0\H,4,R5,3,A5,2,180.,0\H,4,R6,3,A6,2,D6,0\H,4,R6,3,A6,2,

-D6,0\\R2=1.16215384\R3=1.26871371\R4=1.87484403\R5=1.07374324\R6=1.07

417907\A3=137.38870048\A4=77.19235223\A5=86.79141988\A6=112.74735892\D

6=65.61837495\\Version=Sun-SVR4-Unix-G94RevD.3\State=2-A'\HF=-227.1288

82\S2=0.869\S2-1=0.\S2A=0.753\RMSD=0.000e+00\RMSF=3.525e-05\Dipole=-0.

8572128,0.,1.4805787\PG=CS [SG(C2H1O2),X(H2)]\\@

MP2/6-311G**

1\1\GINC-ARGOLIS\FTS\UMP2-FC\6-311G(d,p)\C2H3O2(2)\BLONDIE\21-Jan-1998

\1\\#MP2=DIRECT/6-311** OPT=(EF,TS,READFC) GEOM=CHECKPOINT SCF=DIRECT\

\the calculation of the ground state radical MeOCO\\0,2\O\C,1,R2\O,2,R

3,1,A3\C,3,R4,1,A4,2,D1,0\H,4,R5,3,A5,2,D2,0\H,4,R6,3,A6,2,D6,0\H,4,R7

,3,A7,2,-D7,0\\D1=179.99993507\D2=239.75701509\A3=150.60789831\R2=1.18

09189\R3=1.21701883\R4=1.81263907\R5=1.08242752\R6=1.0824277\R7=1.0849

058\A4=103.68460539\A5=100.87099061\A6=100.8711644\A7=103.01212064\D6=

120.23957786\D7=0.00171152\\Version=CrayXMP-Unicos-G94RevD.2\HF=-227.1

724644\MP2=-227.8307364\PUHF=-227.1861557\PMP2-0=-227.8418954\S2=0.876

\S2-1=0.829\S2A=0.753\RMSD=1.883e-09\RMSF=5.643e-07\Dipole=0.7434766,-

0.0000008,0.395935\PG=C01 [X(C2H3O2)]\\@

QCISD/6-311G**//MP2/6-311G**

QCISD=-227.8600271

CCSD(T)/6-311G**//MP2/6-311G**

CCSD(T)=-227.884937

B3LYP/6-311G**

1\1\GINC-YTTERBIUM\FTS\UB3LYP\6-311G(d,p)\C2H3O2(2)\ROOT\16-Dec-1997\1

\\#B3LYP/6-311G** SCF=DIRECT GEOM=CHECKPOINT OPT=(READFC,EF,TS)\\the c

alculation of the ground state radical MeOCO\\0,2\O\C,1,R2\O,2,R3,1,A3

\C,3,R4,2,A4,1,180.,0\H,4,R5,3,A5,2,180.,0\H,4,R6,3,A6,2,D6,0\H,4,R6,3

,A6,2,-D6,0\\R2=1.17983102\R3=1.27972904\R4=1.85624026\R5=1.08504209\R

6=1.08230966\A3=139.3454238\A4=81.59955349\A5=89.38411984\A6=111.19440

443\D6=64.57586852\\Version=Sun-SVR4-Unix-G94RevD.3\State=2-A'\HF=-228

.4036162\S2=0.757\S2-1=0.\S2A=0.75\RMSD=5.613e-09\RMSF=5.680e-05\Dipol

e=-0.6870364,0.,1.1393932\PG=CS [SG(C2H1O2),X(H2)]\\@

MP2/cc-pVDZ

1\1\GINC-GIUNDA\FTS\UMP2-FC\CC-pVDZ\C2H3O2(2)\BLONDIE\16-Sep-1998\1\\#

MP2=DIRECT/CC-PVDZ GEOM=CHECKPOINT SCF=DIRECT OPT=(EF,TS)\\this is an

ethyl radical using 6-311G**\\0,2\O\C,1,R2\O,2,R3,1,A3\C,3,R4,1,A4,2,D

1,0\H,4,R5,3,A5,2,D2,0\H,4,R6,3,A6,2,D6,0\H,4,R7,3,A7,2,-D7,0\\D1=179.

99882998\D2=239.82001642\A3=150.39134416\R2=1.18904328\R3=1.22485868\R

4=1.82212392\R5=1.09233495\R6=1.09233307\R7=1.09446998\A4=103.35636341

\A5=101.00155251\A6=100.99903008\A7=102.50411187\D6=120.25085964\D7=-0

.035101\\Version=DEC-AXP-OSF/1-G94RevE.2\HF=-227.1297609\MP2=-227.7490

694\PUHF=-227.1438601\PMP2-0=-227.7606158\S2=0.883\S2-1=0.834\S2A=0.75

3\RMSD=9.029e-09\RMSF=1.139e-04\Dipole=0.7357549,-0.000017,0.3819131\P

G=C01 [X(C2H3O2)]\\@

QCISD/cc-pVDZ//MP2/cc-pVDZ

QCISD=-227.7836756

CCSD(T)/cc-pVDZ//MP2/cc-pVDZ

CCSD(T)=-227.804024

MP2/aug-cc-pVDZ

1\1\ CSIRO-CHERAX\FTS\UMP2-FC\CC-pVDZ\C2H3O2(2)\MEMAS\20-Jan-1999\1\\#

MP2=DIRECT/AUG-CC-PVDZ GEOM=CHECKPOINT OPT=(EF,TS) SCF=QC\\this is a c

alc of MeOCSTS-augccpvdzmp2\\0,2\O\C,1,R2\O,2,R3,1,A3\C,3,R4,1,A4,2,D1

,0\H,4,R5,3,A5,2,D2,0\H,4,R6,3,A6,2,D6,0\H,4,R7,3,A7,2,-D7,0\\D1=180.0

0005232\D2=239.68232365\A3=151.6370131\R2=1.19139385\R3=1.22529894\R4=

1.8270103\R5=1.09022729\R6=1.0902276\R7=1.09255561\A4=105.12015665\A5=

99.59871463\A6=99.59919743\A7=102.90290641\D6=120.31057992\D7=0.003624

53\\Version=CrayXMP-Unicos-G94RevB.3\HF=-227.1447274\MP2=-227.7997962\

PUHF=-227.1583522\PMP2-0=-227.8109097\S2=0.877\S2-1=0.83\S2A=0.753\RMS

D=0.000e+00\RMSF=4.983e-07\Dipole=0.7750387,0.0000008,0.4794255\PG=C01

[X(C2H3O2)]\\@

QCISD/aug-cc-pVDZ//MP2/aug-cc-pVDZ

QCISD=-227.8316437

CCSD(T)/aug-cc-pVDZ//MP2/aug-cc-pVDZ

CCSD(T)=-227.856547

MP2/aug-cc-pVTZ//MP2/aug-cc-pVDZ

MP2=-227.9723703

MP2/cc-pVTZ//MP2/aug-cc-pVDZ/

MP2=-227.9723706

# _______________________________________________________

# Transition State (16, R = Et)

UHF/6-311G**

1\1\GINC-ARGOLIS\FTS\UHF\6-311G(d,p)\C3H5O2(2)\BLONDIE\03-Feb-1998\1\\

#UHF/6-311G** SCF=DIRECT GEOM=CHECKPOINT OPT=(EF,TS,READFC)\\the calcu

lation of the ground state radical MeOCO\\0,2\C\O,1,R2\O,1,R3,2,A3\C,3

,R4,2,A4,1,180.,0\C,4,R5,3,A5,2,180.,0\H,4,R6,3,A6,2,D6,0\H,4,R6,3,A6,

2,-D6,0\H,5,R8,4,A8,3,180.,0\H,5,R9,4,A9,3,D9,0\H,5,R9,4,A9,3,-D9,0\\R

2=1.15808837\R3=1.21002877\R4=1.90853568\R5=1.49643131\R6=1.07623168\R

8=1.08914094\R9=1.08393281\A3=146.38859434\A4=100.85665126\A5=101.6872

2789\A6=100.56914263\A8=110.15787776\A9=110.98232796\D6=58.68875692\D9

=60.42337009\\Version=CrayXMP-Unicos-G94RevD.2\State=2-A'\HF=-266.2247

51\S2=0.912\S2-1=0.\S2A=0.754\RMSD=7.166e-09\RMSF=1.083e-04\Dipole=0.9

234218,0.,-0.6676093\PG=CS [SG(C3H1O2),X(H4)]\\@

MP2/6-311G**

1\1\GINC-ARGOLIS\FTS\UMP2-FC\6-311G(d,p)\C3H5O2(2)\BLONDIE\03-Mar-1998

\0\\#MP2=DIRECT/6-311G** SCF=DIRECT OPT=(NOEIGENTEST,TS)\\the calculat

ion of the ground state radical MeOCO\\0,2\C,-1.2544672517,0.003002534

6,0.7369251283\O,-1.3241635572,-0.7817915477,1.6192867669\O,-0.5966804

21,0.6054868595,-0.0907665754\C,1.2102271006,0.2600893988,-0.210126594

4\C,1.3961672227,-0.0645366057,-1.6568811109\H,1.3111187868,-0.5529891

386,0.5048320328\H,1.5886221298,1.2149954515,0.140300568\H,2.459473244

,-0.2253884163,-1.878883453\H,1.0415685331,0.7556854661,-2.2854860568\

H,0.8544067026,-0.973197823,-1.9284291615\\Version=CrayXMP-Unicos-G94R

evD.2\HF=-266.2224071\MP2=-267.0315842\PUHF=-266.2359377\PMP2-0=-267.0

426355\S2=0.877\S2-1=0.83\S2A=0.753\RMSD=9.048e-09\RMSF=8.491e-06\Dipo

le=0.8901807,0.1253904,-0.5138926\PG=C01 [X(C3H5O2)]\\@

QCISD/6-311G**//MP2/6-311G**

QCISD=-267.0727441

CCSD(T)/6-311G**//MP2/6-311G**

CCSD(T)=-267.103347

B3LYP/6-311G**

1\1\GINC-CNET11\FTS\UB3LYP\6-311G(d,p)\C3H5O2(2)\BLONDIE\07-Mar-1999\1

\\#B3LYP/6-311G** OPT=(EF,TS) GEOM=CHECKPOINT SCF=DIRECT\\this is a re

peat of EtOCOTS_ae\\0,2\C\O,1,R2\O,1,R3,2,A3\C,3,R4,2,A4,1,180.,0\C,4,

R5,3,A5,2,180.,0\H,4,R6,3,A6,2,D6,0\H,4,R6,3,A6,2,-D6,0\H,5,R8,4,A8,3,

180.,0\H,5,R9,4,A9,3,D9,0\H,5,R9,4,A9,3,-D9,0\\R2=1.18312621\R3=1.2288

57\R4=1.86352827\R5=1.4904216\R6=1.08464786\R8=1.0984433\R9=1.09199617

\A3=146.20584179\A4=102.03345733\A5=102.48228691\A6=100.21349005\A8=11

0.14741121\A9=111.35358817\D6=58.46198849\D9=60.72293873\\Version=DEC-

AXP-OSF/1-G94RevE.2\HF=-267.7779735\S2=0.764\S2-1=0.\S2A=0.75\RMSD=9.1

40e-09\RMSF=2.717e-05\Dipole=1.0058454,0.,-0.6176714\PG=CS [SG(C3H1O2)

,X(H4)]\\@

# _______________________________________________________

# Transition State (16, R = *iso*-Pr)

e

UHF/6-311G**

1\1\GINC-GIUNDA\PTS\UHF\6-311G(d,p)\C4H7O2(2)\BLONDIE\31-Mar-1998\1\\#

UHF/6-311G** GEOM=CHECKPOINT SCF=DIRECT OPT=(EF,TS)\\the calculation o

f the ground state radical MeOCO\\0,2\C\O,1,R2\O,1,R3,2,A3\C,3,R4,2,A4

,1,180.,0\H,4,R5,3,A5,2,180.,0\C,4,R6,3,A6,2,D6,0\C,4,R6,3,A6,2,-D6,0\

H,6,R10,4,A10,3,180.,0\H,6,R11,4,A11,3,D11,0\H,6,R11,4,A11,3,-D11,0\H,

7,R12,4,A12,3,180.,0\H,7,R13,4,A13,3,-D12,0\H,7,R13,4,A13,3,D12,0\\R2=

1.1606031\R3=1.2107045\R4=1.93133988\R5=1.07641544\R6=1.50219674\R10=1

.09054724\R12=1.09054723\R11=1.08392775\R13=1.08392775\A3=146.90774344

\A4=103.43139397\A5=93.89550396\A6=105.00264157\A10=109.62744156\A11=1

11.34873511\A12=109.62744198\A13=111.34873467\D6=62.67322677\D11=60.84

715717\D12=60.84715618\\Version=DEC-AXP-OSF/1-G94RevE.2\HF=-305.273245

2\S2=0.905\S2-1=0.\S2A=0.754\RMSD=2.659e-09\RMSF=3.367e-04\Dipole=1.02

46831,0.,-0.53838\PG=C01 [X(C4H7O2)]\\@

MP2/6-311G**

1\1\GINC-CNET1\PTS\UMP2-FC\6-311G(d,p)\C4H7O2(2)\BLONDIE\06-Nov-1998\1

\\#MP2=DIRECT/6-311G** SCF=DIRECT OPT=(EF,TS)\\the calculation of the

ground state radical MeOCO\\0,2\C\O,1,R2\O,1,R3,2,A3\C,3,R4,2,A4,1,180

.,0\H,4,R5,3,A5,2,180.,0\C,4,R6,3,A6,2,D6,0\C,4,R6,3,A6,2,-D6,0\H,6,R1

0,4,A10,3,180.,0\H,6,R11,4,A11,3,D11,0\H,6,R11,4,A11,3,-D11,0\H,7,R10,

4,A10,3,180.,0\H,7,R11,4,A11,3,-D11,0\H,7,R11,4,A11,3,D11,0\\R2=1.1868

629\R3=1.21890394\R4=1.8711606\R5=1.08770842\R6=1.49854787\R10=1.09969

316\R11=1.09279726\A3=150.24649148\A4=105.05034482\A5=95.49225455\A6=1

03.93158662\A10=109.78236836\A11=111.10117726\D6=62.04374353\D11=60.76

613629\\Version=DEC-AXP-OSF/1-G94RevE.2\HF=-305.2709442\MP2=-306.23427

92\PUHF=-305.2838059\PMP2-0=-306.244761\S2=0.87\S2-1=0.825\S2A=0.753\R

MSD=3.750e-09\RMSF=5.496e-04\Dipole=1.0289248,0.,-0.4217737\PG=CS [SG(

C2H1O2),X(C2H6)]\\@

QCISD/6-311G**//MP2/6-311G**

QCISD=-306.2865236

CCSD(T)/6-311G**//MP2/6-311G**

CCSD(T)=-306.3233059

B3LYP/6-311G**

1\1\GINC-MURLIBOBO\PTS\UB3LYP\6-311G(d,p)\C4H7O2(2)\BLONDIE\24-Nov-199

8\1\\#B3LYP/6-311G** GEOM=CHECKPOINT SCF=DIRECT OPT=(EF,TS)\\the calcu

lation of the ground state radical IPROCO\\0,2\C\O,1,R2\O,1,R3,2,A3\C,

3,R4,2,A4,1,180.,0\H,4,R5,3,A5,2,180.,0\C,4,R6,3,A6,2,D6,0\C,4,R6,3,A6

,2,-D6,0\H,6,R10,4,A10,3,180.,0\H,6,R11,4,A11,3,D11,0\H,6,R11,4,A11,3,

-D11,0\H,7,R12,4,A12,3,180.,0\H,7,R13,4,A13,3,-D12,0\H,7,R13,4,A13,3,D

12,0\\R2=1.18748277\R3=1.23206704\R4=1.8820825\R5=1.08538681\R6=1.4983

7114\R10=1.09963589\R12=1.09963599\R11=1.09165572\R13=1.0916557\A3=145

.57027587\A4=103.20773798\A5=93.92095666\A6=104.79147817\A10=109.60374

308\A11=111.57546594\A12=109.60374023\A13=111.57546615\D6=62.72862235\

D11=61.06839569\D12=61.06839098\\Version=DEC-AXP-OSF/1-G94RevD.3\HF=-3

07.108684\S2=0.763\S2-1=0.\S2A=0.75\RMSD=4.181e-09\RMSF=4.454e-04\Dipo

le=1.1672682,0.,-0.436163\PG=C01 [X(C4H7O2)]\\@

# _______________________________________________________

# Transition State (16, R = *tert*-Bu)

UHF/6-311G**

1\1\GINC-GIUNDA\FTS\UHF\6-311G(d,p)\C5H9O2(2)\ROOT\06-Mar-1998\1\\#UHF

/6-311G** SCF=DIRECT GEOM=CHECKPOINT OPT=(EF,TS)\\the calculation of t

he ground state radical MeOCO\\0,2\C\O,1,R2\O,1,R3,2,A3\C,3,R4,1,A4,2,

D4,0\C,4,R5,3,A5,1,D5,0\C,4,R6,3,A6,5,D6,0\C,4,R7,3,A7,5,D7,0\H,5,R8,4

,A8,3,D8,0\H,5,R9,4,A9,8,D9,0\H,5,R10,4,A10,8,D10,0\H,6,R11,4,A11,3,D1

1,0\H,6,R12,4,A12,11,D12,0\H,6,R13,4,A13,11,D13,0\H,7,R14,4,A14,3,D14,

0\H,7,R15,4,A15,14,D15,0\H,7,R16,4,A16,14,D16,0\\R2=1.1612832\R3=1.209

24682\R4=1.95170266\R5=1.50245897\R6=1.50527005\R7=1.50526913\R8=1.090

85591\R9=1.08391692\R10=1.08391692\R11=1.09145426\R12=1.08432203\R13=1

.08327544\R14=1.09145438\R15=1.08432232\R16=1.08327524\A3=147.02768783

\A4=120.64032535\A5=97.56485444\A6=103.61201777\A7=103.61233915\A8=109

.75915334\A9=111.18823988\A10=111.1880811\A11=109.4419312\A12=111.2293

4622\A13=111.65854262\A14=109.44188763\A15=111.22936389\A16=111.658549

13\D4=-0.00001236\D5=180.00241915\D6=-119.10152183\D7=119.10206022\D8=

-179.99853979\D9=-119.46158803\D10=119.46135501\D11=175.88872547\D12=-

118.90575798\D13=119.29751277\D14=-175.88856201\D15=118.90559097\D16=-

119.29765029\\Version=DEC-AXP-OSF/1-G94RevE.2\HF=-344.3236735\S2=0.9\S

2-1=0.\S2A=0.754\RMSD=9.933e-09\RMSF=5.930e-05\Dipole=1.0480834,-0.000

0009,-0.6410741\PG=C01 [X(C5H9O2)]\\@

MP2/6-311G**

1\1\GINC-ARGOLIS\FTS\UMP2-FC\6-311G(d,p)\C5H9O2(2)\BLONDIE\25-Apr-1998

\1\\#MP2=DIRECT/6-311G** SCF=DIRECT GEOM=CHECKPOINT OPT=(READFC,EF,TS)

\\the calculation of the ground state radical MeOCO\\0,2\C\O,1,R2\O,1,

R3,2,A3\C,3,R4,1,A4,2,D4,0\C,4,R5,3,A5,1,D5,0\C,4,R6,3,A6,5,D6,0\C,4,R

7,3,A7,5,D7,0\H,5,R8,4,A8,3,D8,0\H,5,R9,4,A9,8,D9,0\H,5,R10,4,A10,8,D1

0,0\H,6,R11,4,A11,3,D11,0\H,6,R12,4,A12,11,D12,0\H,6,R13,4,A13,11,D13,

0\H,7,R14,4,A14,3,D14,0\H,7,R15,4,A15,14,D15,0\H,7,R16,4,A16,14,D16,0\

\R2=1.18767818\R3=1.21975004\R4=1.89202863\R5=1.49795726\R6=1.50097783

\R7=1.50097507\R8=1.1002743\R9=1.09330961\R10=1.09330819\R11=1.1009587

5\R12=1.09339969\R13=1.09292143\R14=1.10095819\R15=1.09339742\R16=1.09

292589\A3=149.68449163\A4=120.23713625\A5=98.80959573\A6=102.72853411\

A7=102.72056861\A8=109.61917258\A9=110.98941885\A10=110.99020031\A11=1

09.43220449\A12=110.97658267\A13=111.42421675\A14=109.43297817\A15=110

.97688163\A16=111.42313521\D4=-0.00136936\D5=179.96811376\D6=-119.4581

0834\D7=119.45661514\D8=-180.01044655\D9=-119.37911856\D10=119.3805057

8\D11=176.99639621\D12=-118.94446289\D13=119.32107034\D14=-176.9992497

7\D15=118.9465568\D16=-119.3191306\\Version=CrayXMP-Unicos-G94RevD.2\H

F=-344.3216587\MP2=-345.4402122\PUHF=-344.3335908\PMP2-0=-345.4499034\

S2=0.861\S2-1=0.819\S2A=0.752\RMSD=8.106e-09\RMSF=2.492e-05\Dipole=1.0

563254,0.0000201,-0.5289102\PG=C01 [X(C5H9O2)]\\@

QCISD/6-311G**//MP2/6-311G**

QCISD=-345.5029027

CCSD(T)/6-311G**//MP2/6-311G**

CCSD(T)=-345.5458239

B3LYP/6-311G**

1\1\GINC-ARGOLIS\FTS\UB3LYP\6-311G(d,p)\C5H9O2(2)\BLONDIE\26-Jul-1998\

1\\#B3LYP/6-311G** SCF=DIRECT GEOM=CHECKPOINT OPT=(READFC,EF,TS)\\the

calculation of the ground state radical MeOCO\\0,2\C\O,1,R2\O,1,R3,2,A

3\C,3,R4,1,A4,2,D4,0\C,4,R5,3,A5,1,D5,0\C,4,R6,3,A6,5,D6,0\C,4,R7,3,A7

,5,D7,0\H,5,R8,4,A8,3,D8,0\H,5,R9,4,A9,8,D9,0\H,5,R10,4,A10,8,D10,0\H,

6,R11,4,A11,3,D11,0\H,6,R12,4,A12,11,D12,0\H,6,R13,4,A13,11,D13,0\H,7,

R14,4,A14,3,D14,0\H,7,R15,4,A15,14,D15,0\H,7,R16,4,A16,14,D16,0\\R2=1.

18913478\R3=1.23412856\R4=1.89340487\R5=1.50062905\R6=1.50360964\R7=1.

50361147\R8=1.09900787\R9=1.09159324\R10=1.09159365\R11=1.09993973\R12

=1.09175377\R13=1.09079879\R14=1.09994061\R15=1.09175378\R16=1.0907967

3\A3=144.675876\A4=120.98591665\A5=98.08361597\A6=103.1713061\A7=103.1

7260099\A8=109.65331134\A9=111.33235838\A10=111.33222024\A11=109.34248

201\A12=111.37417822\A13=111.75381904\A14=109.34237285\A15=111.3744708

4\A16=111.75360388\D4=0.00366712\D5=180.00815311\D6=-119.2673348\D7=11

9.26821583\D8=-179.99851064\D9=-119.29342623\D10=119.29382627\D11=176.

68147986\D12=-118.70665775\D13=119.12644828\D14=-176.68670766\D15=118.

70685877\D16=-119.12650726\\Version=CrayXMP-Unicos-G94RevD.2\HF=-346.4

406347\S2=0.763\S2-1=0.\S2A=0.75\RMSD=4.172e-09\RMSF=2.685e-05\Dipole=

1.2444644,-0.0000673,-0.5637184\PG=C01 [X(C5H9O2)]\\@

# _______________________________________________________

# Transition State (17, R = Me)

UHF/6-311G**

1\1\ CSIRO-CHERAX\FTS\UHF\6-311G(d,p)\C2H3O1S1(2)\MEMAS\19-Feb-1999\1\

\#UHF/6-311G** SCF=DIRECT OPT=(EF,TS)\\this is a calc. the other way a

round\\0,2\C\S,1,R2\O,1,R3,2,A3\C,3,R4,2,A4,1,0.,0\H,4,R5,3,A5,2,180.,

0\H,4,R6,3,A6,2,D6,0\H,4,R6,3,A6,2,-D6,0\\R2=1.60657511\R3=1.24639796\

R4=1.8761384\R5=1.07369457\R6=1.07354789\A3=139.364213\A4=100.54131144

\A5=86.76528878\A6=111.27683696\D6=64.93015763\\Version=CrayXMP-Unicos

-G94RevB.3\State=2-A'\HF=-549.7611233\S2=0.883\S2-1=0.\S2A=0.757\RMSD=

9.829e-09\RMSF=7.574e-05\Dipole=-0.9087639,0.,-1.7862229\PG=CS [SG(C2H

1O1S1),X(H2)]\\@

MP2/6-311G**

1\1\GINC-ARGOLIS\FTS\UMP2-FC\6-311G(d,p)\C2H3O1S1(2)\BLONDIE\27-Jan-19

98\1\\#MP2=DIRECT/6-311G** SCF=DIRECT OPT=(EF,TS,READFC) GEOM=CHECKPOI

NT\\the calculation of the TS state MeOCS\\0,2\C\S,1,R2\O,1,R3,2,A3\C,

3,R4,2,A4,1,180.,0\H,4,R5,3,A5,2,180.,0\H,4,R6,3,A6,2,D6,0\H,4,R6,3,A6

,2,-D6,0\\R2=1.57931231\R3=1.20465763\R4=1.80958505\R5=1.08231633\R6=1

.08434906\A3=153.4919288\A4=103.28498441\A5=99.79405811\A6=102.1984448

4\D6=60.1363349\\Version=CrayXMP-Unicos-G94RevD.2\State=2-A'\HF=-549.8

106807\MP2=-550.4039432\PUHF=-549.8243348\PMP2-0=-550.4150212\S2=0.874

\S2-1=0.827\S2A=0.754\RMSD=3.283e-09\RMSF=7.749e-05\Dipole=0.8606144,0

.,-0.3738884\PG=CS [SG(C2H1O1S1),X(H2)]\\

QCISD/6-311G**//MP2/6-311G**

QCISD=-550.4445369

CCSD(T)/6-311G**//MP2/6-311G**

CCSD(T)=-550.4700048

B3LYP/6-311G**

1\1\GINC-ARGOLIS\FTS\UB3LYP\6-311G(d,p)\C2H3O1S1(2)\BLONDIE\29-Jan-199

8\1\\#B3LYP/6-311G** SCF=DIRECT OPT=(EF,TS,READFC) GEOM=CHECKPOINT\\th

e calculation of the TS state MeOCS\\0,2\C\S,1,R2\O,1,R3,2,A3\C,3,R4,2

,A4,1,180.,0\H,4,R5,3,A5,2,180.,0\H,4,R6,3,A6,2,D6,0\H,4,R6,3,A6,2,-D6

,0\\R2=1.59543818\R3=1.2180139\R4=1.80403312\R5=1.08128335\R6=1.082934

33\A3=150.63657108\A4=102.84515273\A5=99.61628622\A6=102.74642521\D6=6

0.31436505\\Version=CrayXMP-Unicos-G94RevD.2\State=2-A'\HF=-551.406806

8\S2=0.762\S2-1=0.\S2A=0.75\RMSD=3.004e-09\RMSF=2.140e-05\Dipole=0.951

743,0.,-0.4998356\PG=CS [SG(C2H1O1S1),X(H2)]\\@

MP2/cc-pVDZ

1\1\GINC-DHARNYA\FTS\UHF\CC-pVDZ\C2H3O1S1(2)\HERB\24-Nov-1998\1\\#UHF/

CC-PVDZ OPT=(EF,TS) SCF=DIRECT\\this is a calc of MeOCSTS using the cc

pvdz basis set\\0,2\S\C,1,R2\O,2,R3,1,A3\C,3,R4,2,A4,1,180.,0\H,4,R5,3

,A5,2,180.,0\H,4,R6,3,A6,2,D6,0\H,4,R6,3,A6,2,-D6,0\\R2=1.60057966\R3=

1.19862583\R4=1.82624597\R5=1.08191591\R6=1.08264131\A3=155.59091539\A

4=115.90645033\A5=100.75197946\A6=102.47929034\D6=60.25400457\\Version

=DEC-AXP-OSF/1-G94RevD.3\State=2-A'\HF=-549.7625569\S2=0.906\S2-1=0.\S

2A=0.756\RMSD=4.231e-09\RMSF=3.731e-05\Dipole=-0.4349313,0.,1.4570211\

PG=CS [SG(C2H1O1S1),X(H2)]\\@

QCISD/cc-pVDZ//MP2/cc-pVDZ

QCISD=-550.3925802

CCSD(T)/cc-pVDZ//MP2/cc-pVDZ//

CCSD(T)=-550.414752

MP2/aug-cc-pVDZ

1\1\ CSIRO-CHERAX\FTS\UMP2-FC\CC-pVDZ\C2H3O1S1(2)\MEMAS\05-Jan-1999\1\

\#MP2=DIRECT/AUG-CC-PVDZ GEOM=CHECKPOINT OPT=(EF,TS) SCF=QC\\this is a

calc of MeOCSTS-augccpvdzmp2\\0,2\C\S,1,R2\O,1,R3,2,A3\C,3,R4,2,A4,1,

180.,0\H,4,R5,3,A5,2,0.,0\H,4,R6,3,A6,2,D6,0\H,4,R6,3,A6,2,-D6,0\\R2=1

.59702992\R3=1.21255666\R4=1.82861698\R5=1.09297173\R6=1.09070102\A3=1

53.87465867\A4=104.35066082\A5=101.46932178\A6=99.64405163\D6=120.2395

0221\\Version=CrayXMP-Unicos-G94RevB.3\State=2-A'\HF=-549.7925351\MP2=

-550.3924322\PUHF=-549.8065778\PMP2-0=-550.4038687\S2=0.882\S2-1=0.832

\S2A=0.755\RMSD=0.000e+00\RMSF=1.877e-05\Dipole=0.8201143,0.,-0.414586

\PG=CS [SG(C2H1O1S1),X(H2)]\\@

QCISD/aug-cc-pVDZ//MP2/aug-cc-pVDZ

QCISD=-550.434631

CCSD(T)/aug-cc-pVDZ//MP2/aug-cc-pVDZ

CCSD(T)=-550.461378

# _______________________________________________________

**Transition State (18, R = Me)**

# UHF/6-311G**

1\1\GINC-CNET10\FTS\UHF\6-311G(d,p)\C2H3O1S1(2)\ROOT\08-Dec-1998\1\\#U

HF/6-311G** OPT=(EF,TS,READFC) GEOM=CHECKPOINT GUESS=CHECK SCF=DIRECT\

\1st transition state b test\\0,2\S\C,1,r1\X,2,1.,1,90.\O,2,r2,3,a1,1,

180.,0\C,1,r3,2,a2,3,180.,0\H,5,r4,1,a3,2,180.,0\H,5,r5,1,a4,2,d1,0\H,

5,r5,1,a4,2,-d1,0\\r1=1.61614014\r2=1.1438152\r3=2.22329825\r4=1.07825

562\r5=1.07613159\a1=111.91181648\a2=117.04281123\a3=99.99491791\a4=10

4.59208968\d1=60.81219026\\Version=DEC-AXP-OSF/1-G94RevE.2\HF=-549.843

3558\S2=0.897\S2-1=0.\S2A=0.754\RMSD=5.835e-09\RMSF=8.105e-05\Dipole=-

0.4362927,0.,-0.8248453\PG=CS [SG(C2H1O1S1),X(H2)]\\@

# MP2/6-311G**

1\1\GINC-CNET10\FTS\UMP2-FC\6-311G(d,p)\C2H3O1S1(2)\ROOT\09-Dec-1998\1

\\#MP2=DIRECT/6-311G** OPT=(EF,TS,READFC) GEOM=CHECKPOINT GUESS=CHECK

SCF=DIRECT\\1st transition state b test\\0,2\S\C,1,r1\X,2,1.,1,90.\O,2

,r2,3,a1,1,180.,0\C,1,r3,2,a2,3,180.,0\H,5,r4,1,a3,2,180.,0\H,5,r5,1,a

4,2,d1,0\H,5,r5,1,a4,2,-d1,0\\r1=1.59422015\r2=1.17334924\r3=2.1412276

\r4=1.08903157\r5=1.08666843\a1=104.62877146\a2=120.02374183\a3=101.80

780762\a4=106.24534372\d1=60.88317512\\Version=DEC-AXP-OSF/1-G94RevE.2

\HF=-549.839928\MP2=-550.4395794\PUHF=-549.8522546\PMP2-0=-550.4492661

\S2=0.868\S2-1=0.817\S2A=0.753\RMSD=9.468e-09\RMSF=7.886e-05\Dipole=-0

.3112801,0.,-0.5079384\PG=CS [SG(C2H1O1S1),X(H2)]\\@

## QCISD/6-311G**//MP2/6-311G**

QCISD=-550.4749434

## CCSD(T)/6-311G**//MP2/6-311G**

CCSD(T)=-550.4993474

## MP2/cc-pVDZ

1\1\GINC-ARGOLIS\FTS\UMP2-FC\CC-pVDZ\C2H3O1S1(2)\CARLS\21-Jan-1999\1\\

#MP2=DIRECT/CC-PVDZ OPT=(EF,TS,READFC) GEOM=CHECKPOINT GUESS=CHECK SCF

=DIRECT\\transition state b mp2/cc-pvdz test\\0,2\S\C,1,r1\X,2,1.,1,90

.\O,2,r2,3,a1,1,180.,0\C,1,r3,2,a2,3,180.,0\H,5,r4,1,a3,2,180.,0\H,5,r

5,1,a4,2,d1,0\H,5,r5,1,a4,2,-d1,0\\r1=1.61661789\r2=1.18044851\r3=2.14

013175\r4=1.09917474\r5=1.09699912\a1=105.7208484\a2=121.74761043\a3=1

01.76027748\a4=106.01507488\d1=60.8365424\\Version=CrayXMP-Unicos-G94R

evD.2\State=2-A'\HF=-549.8103914\MP2=-550.383857\PUHF=-549.8226945\PMP

2-0=-550.3935437\S2=0.869\S2-1=0.817\S2A=0.753\RMSD=2.975e-09\RMSF=8.0

71e-05\Dipole=-0.2890653,0.,-0.4652014\PG=CS [SG(C2H1O1S1),X(H2)]\\@

## QCISD/cc-pVDZ//MP2/cc-pVDZ

QCISD=-550.4219803

## CCSD(T)/cc-pVDZ//MP2/cc-pVDZ

CCSD(T)=-550.4432437

## MP2/aug-cc-pVDZ

1\1\ CSIRO-CHERAX\FTS\UMP2-FC\CC-pVDZ\C2H3O1S1(2)\MEMAS\29-Jan-1999\1\

\#MP2=DIRECT/AUG-CC-PVDZ OPT=(EF,TS,READFC) GEOM=CHECKPOINT GUESS=CHEC

K SCF=DIRECT\\transition state b mp2/aug-cc-pvdz test\\0,2\S\C,1,r1\X,

2,1.,1,90.\O,2,r2,3,a1,1,180.,0\C,1,r3,2,a2,3,180.,0\H,5,r4,1,a3,2,180

.,0\H,5,r5,1,a4,2,d1,0\H,5,r5,1,a4,2,-d1,0\\r1=1.61412589\r2=1.1837903

1\r3=2.15496236\r4=1.09722236\r5=1.09466222\a1=104.97835899\a2=120.598

66784\a3=100.80243385\a4=105.32751172\d1=60.93450188\\Version=CrayXMP-

Unicos-G94RevB.3\State=2-A'\HF=-549.8225514\MP2=-550.4256634\PUHF=-549

.8350811\PMP2-0=-550.4355833\S2=0.874\S2-1=0.822\S2A=0.753\RMSD=9.515e

-09\RMSF=6.288e-05\Dipole=-0.3190952,0.,-0.6033747\PG=CS [SG(C2H1O1S1)

,X(H2)]\\@

## QCISD/aug-cc-pVDZ//MP2/aug-cc-pVDZ

QCISD=-550.4629347

## CCSD(T)/aug-cc-pVDZ//MP2/aug-cc-pVDZ

CCSD(T)=-550.4886278

# _______________________________________________________

**Transition State (19, R = Me)**

# UHF/6-311G**

1\1\GINC-CNET10\FTS\UHF\6-311G(d,p)\C2H3S2(2)\ROOT\08-Dec-1998\1\\#UHF

/6-311G** OPT=(EF,TS,READFC) GEOM=CHECKPOINT GUESS=CHECK SCF=DIRECT\\1

st sulphur transition state a test\\0,2\S\C,1,r1\X,2,1.,1,90.\S,2,r2,3

,a1,1,180.,0\C,1,r3,2,a2,3,0.,0\H,5,r4,1,a3,2,180.,0\H,5,r5,1,a4,2,d1,

0\H,5,r5,1,a4,2,-d1,0\\r1=1.5678858\r2=1.5595763\r3=2.30432798\r4=1.07

705371\r5=1.07577564\a1=79.28899594\a2=109.57662663\a3=100.12118209\a4

=102.68592299\d1=60.40612369\\Version=DEC-AXP-OSF/1-G94RevE.2\HF=-872.

4844087\S2=0.946\S2-1=0.\S2A=0.758\RMSD=9.614e-09\RMSF=8.231e-05\Dipol

e=0.5424372,0.,-0.8793969\PG=CS [SG(C2H1S2),X(H2)]\\@

# MP2/6-311G**

1\1\GINC-ARGOLIS\FTS\UMP2-FC\6-311G(d,p)\C2H3S2(2)\CARLS\10-Dec-1998\1

\\#MP2=DIRECT/6-311G** OPT=(EF,TS,READFC) GEOM=CHECKPOINT GUESS=CHECK

SCF=DIRECT\\1st sulphur transition state a test\\0,2\S\C,1,r1\X,2,1.,1

,90.\S,2,r2,3,a1,1,180.,0\C,1,r3,2,a2,3,0.,0\H,5,r4,1,a3,2,180.,0\H,5,

r5,1,a4,2,d1,0\H,5,r5,1,a4,2,-d1,0\\r1=1.55578005\r2=1.56264009\r3=2.2

6862295\r4=1.0867396\r5=1.08550233\a1=82.90734436\a2=113.58378054\a3=1

01.16383592\a4=103.58289791\d1=60.3937249\\Version=CrayXMP-Unicos-G94R

evD.2\State=2-A'\HF=-872.4836471\MP2=-873.0173109\PUHF=-872.4979804\PM

P2-0=-873.0291657\S2=0.929\S2-1=0.866\S2A=0.757\RMSD=7.696e-09\RMSF=7.

626e-05\Dipole=0.352267,0.,-0.2708287\PG=CS [SG(C2H1S2),X(H2)]\\@

## QCISD/6-311G**//MP2/6-311G**

QCISD=-873.0637602

## CCSD(T)/6-311G**//MP2/6-311G**

CCSD(T)=-873.0893599

## MP2/cc-pVDZ

1\1\ CSIRO-CHERAX\FTS\UMP2-FC\CC-pVDZ\C2H3S2(2)\MEMAS\29-Jan-1999\1\\#

MP2=DIRECT/CC-PVDZ OPT=(EF,TS,READFC) GEOM=CHECKPOINT GUESS=CHECK SCF=

DIRECT\\1st sulphur transition state a test\\0,2\S\C,1,r1\X,2,1.,1,90.

\S,2,r2,3,a1,1,180.,0\C,1,r3,2,a2,3,0.,0\H,5,r4,1,a3,2,180.,0\H,5,r5,1

,a4,2,d1,0\H,5,r5,1,a4,2,-d1,0\\r1=1.57153238\r2=1.57822461\r3=2.26561

075\r4=1.09752872\r5=1.09624384\a1=83.38781023\a2=114.07853356\a3=101.

57154857\a4=103.2495261\d1=60.27395038\\Version=CrayXMP-Unicos-G94RevB

.3\State=2-A'\HF=-872.4637475\MP2=-872.9841579\PUHF=-872.4783792\PMP2-

0=-872.9962963\S2=0.935\S2-1=0.871\S2A=0.758\RMSD=5.089e-09\RMSF=8.891

e-05\Dipole=0.3397392,0.,-0.2780222\PG=CS [SG(C2H1S2),X(H2)]\\@

## QCISD/cc-pVDZ//MP2/cc-pVDZ

QCISD=-873.0319669

## CCSD(T)/cc-pVDZ//MP2/cc-pVDZ

CCSD(T)=-873.0553509

## MP2/aug-cc-pVDZ

1\1\ CSIRO-CHERAX\FTS\UMP2-FC\CC-pVDZ\C2H3S2(2)\MEMAS\01-Feb-1999\1\\#

MP2=DIRECT/AUG-CC-PVDZ OPT=(EF,TS,READFC) GEOM=CHECKPOINT GUESS=CHECK

SCF=DIRECT\\1st sulphur transition state a test\\0,2\S\C,1,r1\X,2,1.,1

,90.\S,2,r2,3,a1,1,180.,0\C,1,r3,2,a2,3,0.,0\H,5,r4,1,a3,2,180.,0\H,5,

r5,1,a4,2,d1,0\H,5,r5,1,a4,2,-d1,0\\r1=1.57264968\r2=1.58074563\r3=2.2

7770465\r4=1.09511655\r5=1.09361316\a1=82.67373298\a2=113.80150408\a3=

100.6726975\a4=102.3991123\d1=60.32042165\\Version=CrayXMP-Unicos-G94R

evB.3\State=2-A'\HF=-872.4712328\MP2=-873.0181633\PUHF=-872.4862577\PM

P2-0=-873.0306629\S2=0.942\S2-1=0.876\S2A=0.759\RMSD=6.200e-09\RMSF=5.

824e-05\Dipole=0.3444389,0.,-0.3101742\PG=CS [SG(C2H1S2),X(H2)]\\@

## QCISD/aug-cc-pVDZ//MP2/aug-cc-pVDZ

QCISD=-873.0655371

# CCSD(T)/aug-cc-pVDZ//MP2/aug-cc-pVDZ

CCSD(T)=-873.0933526

_______________________________________________________

# Carbon Monoxide

UHF/6-311G**

1\1\GINC-YTTERBIUM\FOpt\UHF\6-311G(d,p)\C1O1\BLONDIE\04-Feb-1999\1\\#U

HF/6-311G** OPT=GRAD SCF=DIRECT\\calc\\0,1\C\O,1,R1\\R1=1.10470007\\Ve

rsion=Sun-SVR4-Unix-G94RevD.3\State=1-SG\HF=-112.7694753\S2=0.\S2-1=0.

\S2A=0.\RMSD=1.436e-09\RMSF=2.053e-08\Dipole=0.,0.,-0.0602581\PG=C*V [

C*(C1O1)]\\@

MP2/6-311G**

1\1\GINC-YTTERBIUM\FOpt\RMP2-FC\6-311G(d,p)\C1O1\ROOT\23-Jan-1998\0\\#

MP2=DIRECT/6-311G** GEOM=CHECKPOINT SCF=DIRECT OPT\\this is a calculti

on of CO\\0,1\C,0.,0.,-0.6507149805\O,0.,0.,0.4880362354\\Version=Sun-

SVR4-Unix-G94RevD.3\State=1-SG\HF=-112.7665067\MP2=-113.0747557\RMSD=7

.319e-09\RMSF=2.135e-05\Dipole=0.,0.,0.1282199\PG=C*V [C*(C1O1)]\\@

QCISD/6-311G**//MP2/6-311G**

QCISD=-113.0817561

CCSD(T)/6-311G**//MP2/6-311G**

CCSD(T)=-113.0929831

B3LYP/6-311G**

1\1\GINC-YTTERBIUM\FOpt\RB3LYP\6-311G(d,p)\C1O1\ROOT\23-Jan-1998\0\\#B

3LYP/6-311G** GEOM=CHECKPOINT SCF=DIRECT OPT\\this is a calcultion of

CO\\0,1\C,0.,0.,-0.6439778357\O,0.,0.,0.4829833767\\Version=Sun-SVR4-U

nix-G94RevD.3\State=1-SG\HF=-113.3462357\RMSD=2.836e-09\RMSF=4.809e-07

\Dipole=0.,0.,0.0477698\PG=C*V [C*(C1O1)]\\@

MP2/cc-pVDZ

1\1\GINC-DHARNYA\FOpt\RMP2-FC\CC-pVDZ\C1O1\HERB\29-Dec-1998\0\\#MP2=SE

MIDIRECT/CC-PVDZ OPT GEOM=CHECKPOINT SCF=DIRECT\\this is a calculation

of CO\\0,1\C,0.,0.,-0.6555300222\O,0.,0.,0.4916475167\\Version=DEC-AX

P-OSF/1-G94RevD.3\State=1-SG\HF=-112.7466898\MP2=-113.0368067\RMSD=6.7

62e-09\RMSF=1.246e-05\Dipole=0.,0.,0.1337251\PG=C*V [C*(C1O1)]\\@

QCISD/cc-pVDZ//MP2/cc-pVDZ

QCISD=-113.0460765

CCSD(T)/cc-pVDZ//MP2/cc-pVDZ

CCSD(T)=-113.0549617

MP2/aug-cc-pVDZ

1\1\GINC-DHARNYA\FOpt\RMP2-FC\Aug-CC-pVDZ\C1O1\HERB\29-Dec-1998\0\\#MP

2=SEMIDIRECT/AUG-CC-PVDZ OPT GEOM=CHECKPOINT SCF=DIRECT\\this is a cal

culation of CO\\0,1\C,0.,0.,-0.6572502511\O,0.,0.,0.4929376883\\Versio

n=DEC-AXP-OSF/1-G94RevD.3\State=1-SG\HF=-112.7516791\MP2=-113.0549699\

RMSD=2.491e-09\RMSF=4.891e-08\Dipole=0.,0.,0.0958595\PG=C*V [C*(C1O1)]

\\@

QCISD/aug-cc-pVDZ//MP2/aug-cc-pVDZ

QCISD=-113.0633792

CCSD(T)/aug-cc-pVDZ//MP2/aug-cc-pVDZ

CCSD(T)=-113.0740351

MP2/aug-cc-pVTZ//MP2/aug-cc-pVDZ

MP2=-113.142158

MP2/cc-pVTZ//MP2/aug-cc-pVDZ

MP2=-113.135374

# _______________________________________________________

# Carbon Dioxide

UHF/6-311G**

1\1\GINC-DHARNYA\FOpt\UHF\6-311G(d,p)\C1O2\HERB\15-Nov-1998\1\\#UHF/6-

311G** SCF=DIRECT OPT=GRAD\\a calculation of CO2\\0,1\X\C,1,7.\O,2,R1,

1,90.\O,2,R1,1,90.,3,180.,0\\R1=1.13523896\\Version=DEC-AXP-OSF/1-G94R

evD.3\State=1-SGG\HF=-187.6875904\S2=0.\S2-1=0.\S2A=0.\RMSD=6.627e-09\

RMSF=5.376e-09\Dipole=0.,0.,0.\PG=D*H [O(C1),C*(O1.O1)]\\@

MP2/6-311G**

1\1\GINC-DHARNYA\FOpt\RMP2-FC\6-311G(d,p)\C1O2\HERB\15-Nov-1998\1\\#MP

2=SEMIDIRECT/6-311G** SCF=DIRECT GEOM=CHECKPOINT OPT=GRAD\\a calculati

on of CO2\\0,1\X\C,1,7.\O,2,R1,1,90.\O,2,R1,1,90.,3,180.,0\\R1=1.16897

36\\Version=DEC-AXP-OSF/1-G94RevD.3\State=1-SGG\HF=-187.6823109\MP2=-1

88.19913\RMSD=8.590e-09\RMSF=1.102e-05\Dipole=0.,0.,0.\PG=D*H [O(C1),C

*(O1.O1)]\\@

QCISD/6-311G**//MP2/6-311G**

QCISD=-188.1950343

CCSD(T)/6-311G**//MP2/6-311G**

CCSD(T)=-188.2141524

B3LYP/6-311G**

1\1\GINC-MURLIBOBO\FOpt\RB3LYP\6-311G(d,p)\C1O2\BLONDIE\30-Dec-1998\0\

\#B3LYP/6-311G** OPT GEOM=CHECKPOINT SCF=DIRECT\\this is a calc of co2

\\0,1\C,0.,0.,0.\O,1.1604306836,0.,0.\O,-1.1604306836,0.,0.\\Version=D

EC-AXP-OSF/1-G94RevD.3\State=1-SGG\HF=-188.6411394\RMSD=5.866e-09\RMSF

=2.096e-07\Dipole=0.,0.,0.\PG=D*H [O(C1),C*(O1.O1)]\\@

MP2/cc-pVDZ

1\1\GINC-DHARNYA\FOpt\RMP2-FC\CC-pVDZ\C1O2\HERB\20-Nov-1998\1\\#MP2=SE

MIDIRECT/CC-PVDZ SCF=DIRECT GEOM=CHECKPOINT OPT=GRAD\\a calculation of

CO2\\0,1\X\C,1,7.\O,2,R1,1,90.\O,2,R1,1,90.,3,180.,0\\R1=1.17708452\\

Version=DEC-AXP-OSF/1-G94RevD.3\State=1-SGG\HF=-187.6468224\MP2=-188.1

335527\RMSD=3.298e-09\RMSF=6.365e-07\Dipole=0.,0.,0.\PG=D*H [O(C1),C*(

O1.O1)]\\@

QCISD/cc-pVDZ//MP2/cc-pVDZ

QCISD=-188.1327901

CCSD(T)/cc-pVDZ//MP2/cc-pVDZ

CCSD(T)=-188.1482273

MP2/aug-cc-pVDZ

1\1\GINC-ARGOLIS\FOpt\RMP2-FC\Aug-CC-pVDZ\C1O2\BLONDIE\02-Oct-1998\0\\

#MP2=SEMIDIRECT/AUG-CC-PVDZ GEOM=CHECKPOINT OPT SCF=DIRECT\\this is a

calc of MeCOTSccPVDZ\\0,1\C,0.,0.,0.0004750733\O,0.,1.1802232246,-0.00

01781525\O,0.,-1.1802232246,-0.0001781525\\Version=CrayXMP-Unicos-G94R

evD.2\State=1-A1\HF=-187.657814\MP2=-188.1697002\RMSD=6.398e-09\RMSF=7

.151e-05\Dipole=0.,0.,0.000541\PG=C02V [C2(C1),SGV(O2)]\\@

QCISD/aug-cc-pVDZ//MP2/aug-cc-pVDZ

QCISD=-188.1674012

CCSD(T)/aug-cc-pVDZ//MP2/aug-cc-pVDZ

CCSD(T)=-188.1860253

MP2/aug-cc-pVTZ//MP2/aug-cc-pVDZ

MP2=-188.3212695

MP2/cc-pVTZ//MP2/aug-cc-pVDZ

MP2=-188.3081398

# _______________________________________________________

# COS

UHF/6-311G**

1\1\GINC-DHARNYA\FOpt\UHF\6-311G(d,p)\C1O1S1\HERB\20-Jan-1999\1\\#UHF/

6-311G** OPT=GRAD SCF=DIRECT\\tOhis is a cal\\0,1\X\C,1,7.\O,2,R1,1,90

.\S,2,R2,1,90.,3,180.,0\\R1=1.1235446\R2=1.56893469\\Version=DEC-AXP-O

SF/1-G94RevD.3\State=1-SG\HF=-510.3126324\S2=0.\S2-1=0.\S2A=0.\RMSD=7.

764e-09\RMSF=1.742e-05\Dipole=-0.0703598,0.,0.\PG=C*V [C*(O1C1S1)]\\@

MP2/6-311G**

1\1\GINC-DHARNYA\FOpt\RMP2-FC\6-311G(d,p)\C1O1S1\HERB\20-Jan-1999\1\\#

MP2=DIRECT/6-311G** GEOM=CHECKPOINT OPT=GRAD SCF=DIRECT\\t\\0,1\X\C,1,

7.\O,2,R1,1,90.\S,2,R2,1,90.,3,180.,0\\R1=1.16866413\R2=1.56523015\\Ve

rsion=DEC-AXP-OSF/1-G94RevD.3\State=1-SG\HF=-510.3083064\MP2=-510.7655

294\RMSD=2.257e-09\RMSF=1.198e-05\Dipole=-0.2023731,0.,0.\PG=C*V [C*(O

1C1S1)]\\@

QCISD/6-311G**//MP2/6-311G**

QCISD=-510.7711588

CCSD(T)/6-311G**//MP2/6-311G**

CCSD(T)=-510.7913602

B3LYP/6-311G**

1\1\GINC-ARGOLIS\FOpt\RB3LYP\6-311G(d,p)\C1O1S1\BLONDIE\02-Feb-1998\0\

\#B3LYP/6-311G** OPT NOSYMM SCF=DIRECT\\a calculation of COS\\0,1\C,0.

0641722452,0.0316309243,1.6044487342\O,1.1821267479,-0.0237200322,1.31

54690747\S,-1.455263692,0.106824123,1.9965742828\\Version=CrayXMP-Unic

os-G94RevD.2\HF=-511.5952727\RMSD=6.180e-09\RMSF=4.261e-05\Dipole=-0.2

013231,0.0099752,0.0520888\PG=\\@

MP2/cc-pVDZ

1\1\GINC-DHARNYA\FOpt\RMP2-FC\CC-pVDZ\C1O1S1\HERB\01-Jan-1999\0\\#MP2=

SEMIDIRECT/CC-PVDZ OPT SCF=DIRECT GEOM=CHECKPOINT\\this is a calc of C

OS-ccpvdz\\0,1\C,0.5292144599,0.,0.\O,1.7052900016,0.,0.\S,-1.05110042

32,0.,0.\\Version=DEC-AXP-OSF/1-G94RevD.3\State=1-SG\HF=-510.2877313\M

P2=-510.7274965\RMSD=9.930e-09\RMSF=3.093e-05\Dipole=-0.1441743,0.,0.\

PG=C*V [C*(O1C1S1)]\\@

QCISD/cc-pVDZ//MP2/cc-pVDZ

QCISD=-510.7350045

CCSD(T)/cc-pVDZ//MP2/cc-pVDZ//

CCSD(T)=-510.7524932

MP2/aug-cc-pVDZ

1\1\GINC-DHARNYA\FOpt\RMP2-FC\Aug-CC-pVDZ\C1O1S1\BLONDIE\15-Nov-1998\1

\\#MP2=SEMIDIRECT/AUG-CC-PVDZ GEOM=CHECKPOINT OPT=GRAD GUESS=CHECK SCF

=DIRECT\\a calculation of COS\\0,1\X\C,1,7.\O,2,R1,1,90.\S,2,R2,1,90.,

3,180.,0\\R1=1.17942635\R2=1.58324738\\Version=DEC-AXP-OSF/1-G94RevD.3

\State=1-SG\HF=-510.2962122\MP2=-510.7576599\RMSD=9.726e-09\RMSF=5.495

e-05\Dipole=-0.2534786,0.,0.\PG=C*V [C*(O1C1S1)]\\@

QCISD/aug-cc-pVDZ//MP2/aug-cc-pVDZ

QCISD=-510.764192

CCSD(T)/aug-cc-pVDZ//MP2/aug-cc-pVDZ

CCSD(T)=-510.7849586

MP2/aug-cc-pVDZ//MP2/aug-cc-pVTZ

MP2=-510.8959838

MP2/cc-pVTZ//MP2/aug-cc-pVDZ

MP2=-510.8848388

# _______________________________________________________

**Carbon disulfide**

# UHF/6-311G**

1\1\GINC-DHARNYA\FOpt\RHF\6-311G(d,p)\C1S2\HERB\02-Dec-1998\1\\#RHF/6-

311G** OPT=(GRAD,READFC) GEOM=CHECKPOINT GUESS=CHECK SCF=DIRECT\\sulph

ur-carbon-sulphur test\\0,1\X\C,1,2.\S,2,r1,1,90.\S,2,r1,1,90.,3,180.,

0\\r1=1.54280862\\Version=DEC-AXP-OSF/1-G94RevD.3\State=1-SGG\HF=-832.

9364339\RMSD=4.421e-09\RMSF=4.028e-09\Dipole=0.,0.,0.\PG=D*H [O(C1),C*

(S1.S1)]\\@

# MP2/6-311G**

1\1\GINC-DHARNYA\FOpt\RMP2-FC\6-311G(d,p)\C1S2\HERB\20-Jan-1999\1\\#MP

2=DIRECT/6-311G** OPT=(GRAD,READFC) GEOM=CHECKPOINT GUESS=CHECK SCF=DI

RECT\\sulphur-carbon-sulphur test\\0,1\X\C,1,2.\S,2,r1,1,90.\S,2,r1,1,

90.,3,180.,0\\r1=1.56168588\\Version=DEC-AXP-OSF/1-G94RevD.3\State=1-S

GG\HF=-832.9356496\MP2=-833.3351671\RMSD=1.691e-09\RMSF=2.297e-07\Dipo

le=0.,0.,0.\PG=D*H [O(C1),C*(S1.S1)]\\@

## QCISD/6-311G**//MP2/6-311G**

1\1\GINC-DHARNYA\SP\RQCISD-FC\6-311G(d,p)\C1S2\HERB\14-Dec-1998\0\\#QC

ISD/6-311G** GEOM=CHECKPOINT GUESS=CHECK SCF=DIRECT\\sulphur-carbon-su

lphur qcisd test\\0,1\X\C,1,2.\S,2,1.5614671011,1,90.\S,2,1.5614671011

,1,90.,3,180.,0\\Version=DEC-AXP-OSF/1-G94RevD.3\State=1-SGG\HF=-832.9

356674\MP2=-833.335167\MP3=-833.3397955\MP4D=-833.352623\MP4DQ=-833.33

97033\MP4SDQ=-833.3494694\QCISD=-833.3491045\RMSD=2.280e-10\PG=D*H [O(

C1),C*(S1.S1)]\\@

## CCSD(T)/6-311G**//MP2/6-311G**

1\1\GINC-DHARNYA\SP\RCCSD(T)\6-311G(d,p)\C1S2\HERB\15-Dec-1998\0\\#CCS

D(T)/6-311G** GEOM=CHECKPOINT GUESS=CHECK SCF=DIRECT\\sulphur-carbon-s

ulphur ccsdt test\\0,1\X\C,1,2.\S,2,1.5616844568,1,90.\S,2,1.561684456

8,1,90.,3,180.,0\\Version=DEC-AXP-OSF/1-G94RevD.3\State=1-SGG\HF=-832.

9356497\MP2=-833.3351671\MP3=-833.3397863\MP4D=-833.3526184\MP4DQ=-833

.3396965\MP4SDQ=-833.3494699\CCSD=-833.3458824\CCSD(T)=-833.3707884\RM

SD=3.435e-10\PG=D*H [O(C1),C*(S1.S1)]\\@

## MP2/cc-pVDZ

1\1\GINC-ARGOLIS\FOpt\RMP2-FC\CC-pVDZ\C1S2\CARLS\20-Jan-1999\1\\#MP2=S

EMIDIRECT/CC-PVDZ OPT=(GRAD,READFC) GEOM=CHECKPOINT GUESS=CHECK SCF=DI

RECT\\sulphur-carbon-sulphur mp2/cc-pvdz test\\0,1\X\C,1,2.\S,2,r1,1,9

0.\S,2,r1,1,90.,3,180.,0\\r1=1.57582576\\Version=CrayXMP-Unicos-G94Rev

D.2\State=1-SGG\HF=-832.9247403\MP2=-833.3200422\RMSD=3.013e-09\RMSF=1

.592e-08\Dipole=0.,0.,0.\PG=D*H [O(C1),C*(S1.S1)]\\@

## QCISD/cc-pVDZ//MP2/cc-pVDZ

QCISD=-833.3338177

## CCSD(T)/cc-pVDZ//MP2/cc-pVDZ

CCSD(T)=-833.3542474

## MP2/aug-cc-pVDZ

1\1\GINC-ARGOLIS\FOpt\RMP2-FC\Aug-CC-pVDZ\C1S2\CARLS\21-Jan-1999\1\\#M

P2=SEMIDIRECT/AUG-CC-PVDZ OPT=(GRAD,READFC) GEOM=CHECKPOINT GUESS=CHEC

K SCF=DI\\sulphur-carbon-sulphur mp2/aug-cc-pvdz test\\0,1\X\C,1,2.\S,

2,r1,1,90.\S,2,r1,1,90.,3,180.,0\\r1=1.57936724\\Version=CrayXMP-Unico

s-G94RevD.2\State=1-SGG\HF=-832.9292844\MP2=-833.3435438\RMSD=2.637e-0

9\RMSF=9.106e-09\Dipole=0.,0.,0.\PG=D*H [O(C1),C*(S1.S1)]\\@

## QCISD/aug-cc-pVDZ//MP2/aug-cc-pVDZ

QCISD=-833.3562927

# CCSD(T)/aug-cc-pVDZ//MP2/aug-cc-pVDZ

CCSD(T)=-833.3800044

**_______________________________________________________**

# Methyl Radical

UHF/6-311G**

1\1\GINC-DHARNYA\FOpt\UHF\6-311G(d,p)\C1H3(2)\HERB\24-Jun-1998\0\\#UHF

/6-311G** OPT SCF=DIRECT\\this is a calculation of SiH3Cl\\0,2\H,-0.17

91449973,-0.3102014475,-1.0119017928\C,0.0001130304,0.0001957878,-0.00

00827545\H,0.8943027423,-0.3102805183,0.5061552725\H,-0.7158359276,0.6

193072391,0.5062430476\\Version=DEC-AXP-OSF/1-G94RevD.3\State=2-A'\HF=

-39.5729133\S2=0.761\S2-1=0.\S2A=0.75\RMSD=4.780e-09\RMSF=1.162e-05\Di

pole=-0.0002865,-0.0004963,0.0002056\PG=CS [SG(C1H1),X(H2)]\\@

MP2/6-311G**

1\1\GINC-DHARNYA\FOpt\UMP2-FC\6-311G(d,p)\C1H3(2)\HERB\24-Jun-1998\0\\

#MP2=SEMIDIRECT/6-311G** GEOM=CHECKPOINT OPT SCF=DIRECT\\this is a cal

culation of SiH3Cl\\0,2\H,-0.1798688652,-0.3114546986,-1.0178357035\C,

-0.0000312549,-0.0000541385,0.0000207337\H,0.8996655185,-0.3115413676,

0.5088115141\H,-0.7196091241,0.6233208972,0.5088997873\\Version=DEC-AX

P-OSF/1-G94RevD.3\State=2-A'\HF=-39.5728361\MP2=-39.7072378\PUHF=-39.5

758455\PMP2-0=-39.7091745\S2=0.762\S2-1=0.753\S2A=0.75\RMSD=2.429e-09\

RMSF=1.252e-04\Dipole=0.0000795,0.0001378,-0.0000555\PG=CS [SG(C1H1),X

(H2)]\\@

QCISD/6-311G**//MP2/6-311G**

QCISD=-39.7291388

CCSD(T)/6-311G**//MP2/6-311G**

CCSD(T)=-39.7322127

B3LYP/6-311G**

1\1\GINC-DHARNYA\FOpt\UB3LYP\6-311G(d,p)\C1H3(2)\HERB\25-Jun-1998\0\\#

B3LYP/6-311G** GEOM=CHECKPOINT OPT SCF=DIRECT\\this is a calculation o

f SiH3Cl\\0,2\H,-0.1801527318,-0.311946307,-1.018649424\C,0.0000314688

,0.0000545091,-0.000020461\H,0.9003468996,-0.3120415851,0.5093419187\H

,-0.7203829807,0.6236608378,0.5094302711\\Version=DEC-AXP-OSF/1-G94Rev

D.3\State=2-A'\HF=-39.8537573\S2=0.754\S2-1=0.\S2A=0.75\RMSD=5.471e-09

\RMSF=7.899e-06\Dipole=-0.0000818,-0.0001416,0.0000565\PG=CS [SG(C1H1)

,X(H2)]\\@

MP2/cc-pVDZ

1\1\GINC-DHARNYA\FOpt\UMP2-FC\Gen\C1H3(2)\HERB\25-Jun-1998\0\\#MP2=SEM

IDIRECT/GEN OPT SCF=DIRECT\\this is a calculation of SiH3Cl\\0,2\H,-0.

1811778366,-0.3137015901,-1.0275243923\C,-0.0001770065,-0.0003066111,0

.0001391866\H,0.9083130088,-0.3140193922,0.5132901433\H,-0.7260731331,

0.6295606492,0.5133991296\\Version=DEC-AXP-OSF/1-G94RevD.3\State=2-A'\

HF=-39.5636706\MP2=-39.6906404\PUHF=-39.5666906\PMP2-0=-39.692585\S2=0

.762\S2-1=0.753\S2A=0.75\RMSD=1.354e-09\RMSF=1.437e-05\Dipole=0.000425

8,0.0007375,-0.0003121\PG=CS [SG(C1H1),X(H2)]\\@

QCISD/cc-pVDZ//MP2/cc-pVDZ

QCISD=-39.7137154

CCSD(T)/cc-pVDZ//MP2/cc-pVDZ

CCSD(T)=-39.7162786

MP2/aug-cc-pVDZ

1\1\GINC-DHARNYA\FOpt\UMP2-FC\Gen\C1H3(2)\HERB\24-Jun-1998\0\\#MP2=SEM

IDIRECT/GEN OPT SCF=DIRECT\\this is a calculation of SiH3Cl\\0,2\H,-0.

181175112,-0.313713987,-1.0256878565\C,-0.0000145634,-0.0000252262,0.0

000094271\H,0.9064788192,-0.3140833805,0.5127698712\H,-0.7252163268,0.

6279487248,0.5128614226\\Version=DEC-AXP-OSF/1-G94RevD.3\State=2-A'\HF

=-39.5656621\MP2=-39.6982657\PUHF=-39.5686377\PMP2-0=-39.7001663\S2=0.

762\S2-1=0.753\S2A=0.75\RMSD=6.533e-09\RMSF=2.636e-06\Dipole=0.0000357

,0.0000618,-0.0000255\PG=CS [SG(C1H1),X(H2)]\\@

QCISD/aug-cc-pVDZ//MP2/aug-cc-pVDZ

QCISD=-39.7214323

CCSD(T)/aug-cc-pVDZ//MP2/aug-cc-pVDZ

CCSD(T)=-39.7246524

MP2/aug-cc-pVTZ//MP2/aug-cc-pVDZ

MP2=-39.7379846

MP2/cc-pVTZ//MP2/aug-cc-pVDZ

MP2=-39.735329

# _______________________________________________________

# Ethyl Radical

UHF/6-311G**

1\1\GINC-GIUNDA\Freq\UHF\6-311G(d,p)\C2H5(2)\ROOT\27-Feb-1998\0\\#UHF/

6-311G** SCF=DIRECT GUESS=CHECK GEOM=CHECKPOINT FREQ\\this is an ethyl

radical using 6-311G**\\0,2\C,0.3373796134,0.0984712724,-0.604310695\

C,-0.4134973333,-0.1171682803,0.6736549526\H,1.3947395196,0.2954888888

,-0.4197091847\H,-0.7578340971,0.7227780005,1.2511124869\H,-0.40569361

48,-1.0794045968,1.1547621524\H,-0.0559429487,0.9478446191,-1.15466311

26\H,0.2814374599,-0.7745248642,-1.2475678875\\Version=DEC-AXP-OSF/1-G

94RevD.3\HF=-78.6197456\S2=0.763\S2-1=0.\S2A=0.75\RMSD=2.598e-09\RMSF=

2.928e-05\Dipole=0.0898554,0.0185302,-0.0176589[X(C2H5)]\\@

MP2/6-311G**

N-N= 3.690519275856D+01 E-N=-2.563330016717D+02 KE= 7.855894519400D+01

1\1\GINC-GIUNDA\FOpt\UMP2-FC\6-311G(d,p)\C2H5(2)\ROOT\27-Feb-1998\0\\#

MP2=DIRECT/6-311G** GEOM=CHECKPOINT SCF=DIRECT OPT=READFC\\this is an

ethyl radical using 6-311G**\\0,2\C,0.3350635055,0.0979392942,-0.60305

32915\C,-0.4103628552,-0.1164480018,0.6732878529\H,1.4009724384,0.2967

002861,-0.4205943558\H,-0.7622111882,0.7281072252,1.2513457962\H,-0.40

73811183,-1.0860916607,1.153913439\H,-0.059614527,0.9540464776,-1.1564

191166\H,0.2800304931,-0.7817100829,-1.2496531312\\Version=DEC-AXP-OSF

/1-G94RevD.3\HF=-78.6195692\MP2=-78.9029611\PUHF=-78.6228479\PMP2-0=-7

8.9050681\S2=0.763\S2-1=0.754\S2A=0.75\RMSD=2.301e-09\RMSF=1.018e-04\D

ipole=0.099078,0.0210552,-0.0311441\PG=C01 [X(C2H5)]\\@

QCISD/6-311G**//MP2/6-311G**

QCISD=-78.9382071

CCSD(T)/6-311G**//MP2/6-311G**

CCSD(T)=-78.9465217

B3LYP/6-311G**

1\1\GINC-DHARNYA\FOpt\UB3LYP\6-311G(d,p)\C2H5(2)\HERB\31-Dec-1998\0\\#

B3LYP/6-311G** OPT SCF=DIRECT\\this is a calc of ethyl\\0,2\C,-0.05595

6531,0.0969195548,-0.6843209492\C,0.0747026573,-0.1293887979,0.7804365

769\H,0.9198243437,0.1790078719,-1.172882749\H,0.8917996791,0.30899065

44,1.3396400093\H,-0.7134935958,-0.61782585,1.3396400093\H,-0.61493753

64,-0.7070873127,-1.172882749\H,-0.5956696483,1.0317300953,-0.91020828

66\\Version=DEC-AXP-OSF/1-G94RevD.3\State=2-A'\HF=-79.183651\S2=0.754\

S2-1=0.\S2A=0.75\RMSD=7.767e-09\RMSF=1.086e-04\Dipole=-0.0321944,0.055

7624,-0.0875543\PG=CS [SG(C2H1),X(H4)]\\@

# _______________________________________________________

# *iso*-Propyl radical

UHF/6-311G**

1\1\GINC-YTTERBIUM\FOpt\UHF\6-311G(d,p)\C3H7(2)\ROOT\10-Oct-1998\0\\#U

HF/6-311G** SCF=DIRECT OPT GEOM=CHECKPOINT\\this is a calc of iPr\\0,2

\C,-0.1383655574,-0.4807423647,-1.2174199408\C,-0.1432081306,-0.444302

1488,0.2815048651\H,0.8779937645,-0.4390627635,-1.6164725266\H,-0.6777

362577,0.3672980969,-1.6331035608\H,-0.5974697162,-1.3888564159,-1.595

0382181\C,0.2033961711,0.8199326827,1.0093116128\H,-0.0317818545,-1.37

762372,0.8095734436\H,-0.0356177905,0.7494471725,2.0656957588\H,1.2689

497299,1.0488321078,0.9307807615\H,-0.3352727743,1.6706365073,0.598185

1196\\Version=Sun-SVR4-Unix-G94RevD.3\HF=-117.6676134\S2=0.763\S2-1=0.

\S2A=0.75\RMSD=5.475e-09\RMSF=8.609e-06\Dipole=0.0939282,0.0061883,-0.

0180309\PG=C01 [X(C3H7)]\\@

MP2/6-311G**

1\1\ CSIRO-CHERAX\FOpt\UMP2-FC\6-311G(d,p)\C3H7(2)\MEMAS\18-Oct-1998\0

\\#MP2=DIRECT/6-311G** SCF=DIRECT OPT\\THIS IS A CALC OF IPR\\0,2\C,-0

.1422199685,-0.5101197019,-1.196631621\C,-0.0833002935,-0.4549785715,0

.2958278365\H,0.8528585477,-0.3611812061,-1.6451104367\H,-0.7875289326

,0.2821468896,-1.5924888812\H,-0.5204281256,-1.4714974169,-1.553637209

8\C,0.1622500105,0.8502302681,0.9813949033\H,0.1348935167,-1.370140506

2,0.8368773672\H,-0.0154746966,0.7842181632,2.0578653327\H,1.200225252

9,1.1909708578,0.8398082076\H,-0.4849240538,1.6346912502,0.5731389076\

\Version=CrayXMP-Unicos-G94RevB.3\HF=-117.667265\MP2=-118.1014494\PUHF

=-117.6706824\PMP2-0=-118.1036465\S2=0.764\S2-1=0.754\S2A=0.75\RMSD=5.

417e-09\RMSF=7.755e-06\Dipole=0.0990319,0.024805,-0.0293324\PG=C01 [X(

C3H7)]\\@

QCISD/6-311G**//MP2/6-311G**

QCISD=-118.1493594

CCSD(T)/6-311G**//MP2/6-311G**

CCSD(T)=-118.1631973

B3LYP/6-311G**

1\1\ CSIRO-CHERAX\FOpt\UB3LYP\6-311G(d,p)\C3H7(2)\MEMAS\22-Oct-1998\0\

\#B3LYP/6-311G** GEOM=CHECKPOINT SCF=DIRECT OPT\\THIS IS A CALC OF IPR

\\0,2\C,-0.1432918194,-0.5157321264,-1.1986525883\C,-0.0628947034,-0.4

469827113,0.2879718384\H,0.8389357295,-0.3514351589,-1.6743321352\H,-0

.807492565,0.2587386748,-1.6030574069\H,-0.50571139,-1.4867786587,-1.5

450915168\C,0.1623465045,0.8496411486,0.9874270353\H,0.0460806283,-1.3

690787584,0.8486570047\H,-0.0011964486,0.7680225193,2.0648735366\H,1.1

913919503,1.2227655603,0.8463855615\H,-0.4989677946,1.636207956,0.6020

872434\\Version=CrayXMP-Unicos-G94RevB.3\HF=-118.5141567\S2=0.754\S2-1

=0.\S2A=0.75\RMSD=9.790e-09\RMSF=7.405e-06\Dipole=0.0657361,0.0264568,

-0.0257114\PG=C01 [X(C3H7)]\\@

# _______________________________________________________

# *tert*-Butyl radical

UHF/6-311G**

1\1\GINC-GIUNDA\FOpt\UHF\6-311G(d,p)\C4H9(2)\BLONDIE\06-Apr-1998\0\\#U

HF/6-311G** SCF=DIRECT OPT\\a calculation of butyl\\0,2\C,-0.403801643

5,0.0002602082,-1.4308226332\C,-0.190490673,0.0001168964,0.0567554873\

H,0.5486745351,-0.0002980479,-1.9689724229\H,-0.9533657265,0.879835199

9,-1.7538452709\H,-0.9544081736,-0.8786554033,-1.7538644213\C,0.234674

5716,1.2868830384,0.7058437501\C,0.2330906558,-1.2871823318,0.70582131

93\H,0.1023067389,1.2517153097,1.7834746066\H,-0.3319373494,2.13152603

44,0.3242079423\H,1.2917650658,1.4969085359,0.5179092464\H,0.100829360

9,-1.2518474272,1.7834580363\H,1.2899049512,-1.4985395466,0.5178258367

\H,-0.3346068678,-2.1311115219,0.3242189055\\Version=DEC-AXP-OSF/1-G94

RevE.2\HF=-156.7155438\S2=0.764\S2-1=0.\S2A=0.75\RMSD=9.298e-09\RMSF=8

.233e-05\Dipole=0.083441,-0.0000511,-0.0249082\PG=C01 [X(C4H9)]\\@

MP2/6-311G**

1\1\GINC-GIUNDA\FOpt\UMP2-FC\6-311G(d,p)\C4H9(2)\BLONDIE\07-Apr-1998\0

\\#MP2=DIRECT/6-311G** SCF=DIRECT OPT=READFC GEOM=CHECKPOINT\\a calcul

ation of butyl\\0,2\C,-0.402533272,0.0002585128,-1.424744452\C,-0.1950

915617,0.0001197943,0.0582092286\H,0.5622734047,-0.0003342326,-1.96030

00115\H,-0.9512215108,0.8889181823,-1.7527435625\H,-0.9523200571,-0.88

77173784,-1.7527558975\C,0.2331340997,1.2818807936,0.7031088511\C,0.23

15537776,-1.2821774796,0.7030901948\H,0.106009604,1.245977861,1.789804

9995\H,-0.3334138154,2.1345845265,0.3154514219\H,1.299849482,1.4867982

757,0.5086871302\H,0.1044673857,-1.2461357814,1.7897862088\H,1.2980173

92,-1.4884035998,0.5086709679\H,-0.3360401464,-2.1341775798,0.31541580

83\\Version=DEC-AXP-OSF/1-G94RevE.2\HF=-156.7150313\MP2=-157.3021141\P

UHF=-156.7184484\PMP2-0=-157.3043086\S2=0.764\S2-1=0.754\S2A=0.75\RMSD

=3.408e-09\RMSF=7.926e-06\Dipole=0.0988487,-0.0000607,-0.0294926\PG=C0

1 [X(C4H9)]\\@

QCISD/6-311G**//MP2/6-311G**

QCISD=-157.3619439

B3LYP/6-311G**

1\1\GINC-GIUNDA\FOpt\UB3LYP\6-311G(d,p)\C4H9(2)\BLONDIE\07-Apr-1998\0\

\#B3LYP/6-311G** SCF=DIRECT OPT GEOM=CHECKPOINT\\a calculation of buty

l\\0,2\C,-0.4112810818,0.0002636644,-1.4283157321\C,-0.1432430455,0.00

0078316,0.0427079233\H,0.5240010908,-0.0004494487,-2.017393987\H,-0.97

25800805,0.8874752239,-1.7388659753\H,-0.9739369654,-0.8860688964,-1.7

38917187\C,0.2277204514,1.2868555381,0.7077980019\C,0.2261551097,-1.28

71535351,0.7077870338\H,0.0808956809,1.2407812173,1.7917925403\H,-0.35

56282184,2.1278882017,0.3192295418\H,1.2909310452,1.5425200018,0.54664

99388\H,0.0791517364,-1.2409054171,1.7917275857\H,1.2891149459,-1.5439

922756,0.5468553123\H,-0.3580578373,-2.1275125074,0.3190588694\\Versio

n=DEC-AXP-OSF/1-G94RevE.2\HF=-157.844351\S2=0.754\S2-1=0.\S2A=0.75\RMS

D=7.438e-09\RMSF=5.545e-05\Dipole=0.072068,-0.0000484,-0.0216198\PG=C0

1 [X(C4H9)]\\@

# _______________________________________________________
